# Supplementary material for: Cu(i)/TF–BiphamPhos-catalyzed asymmetric 1,3-dipolar cycloaddition of azomethine ylides with dimethyl itaconate and 2-methyleneglutarate
Source: Royal Society of Chemistry journal article supplement (doi:10.1039/c4ra02195a), 2014-01-01
Supplement: c4ra02195a1.pdf [file c4ra02195a1.pdf]

## Supporting Information

### **Cu(I)/TF-BiphamPhos-Catalyzed Asymmetric 1,3-Dipolar Cycloaddition of Azomethine Ylides with Dimethyl Itaconate and 2-Methyleneglutarate**

#### Table of Contents

|                                                            |        |
|------------------------------------------------------------|--------|
| I. <sup>1</sup> H NMR and <sup>13</sup> C NMR Spectra..... | S2-27  |
| II. HPLC Chromatograms.....                                | S28-53 |

# I. $^1\text{H}$ NMR and $^{13}\text{C}$ NMR Spectra

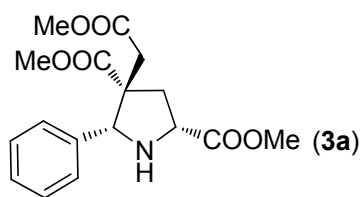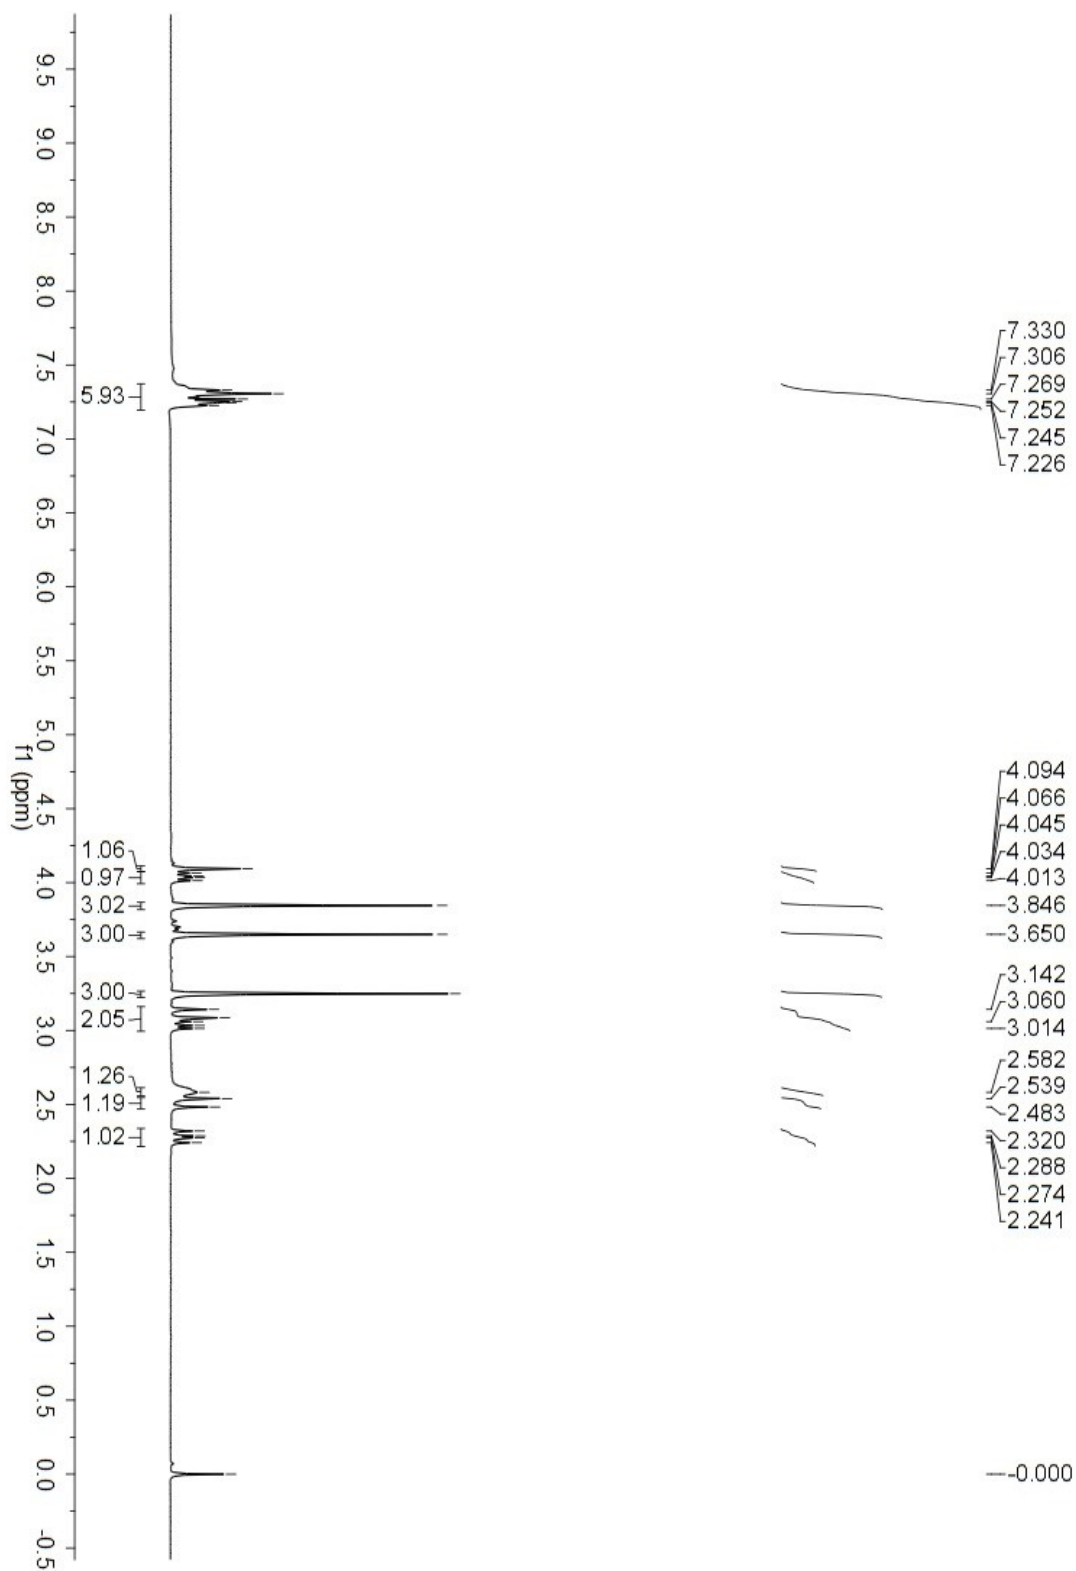

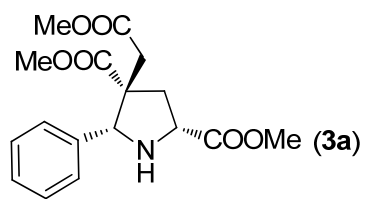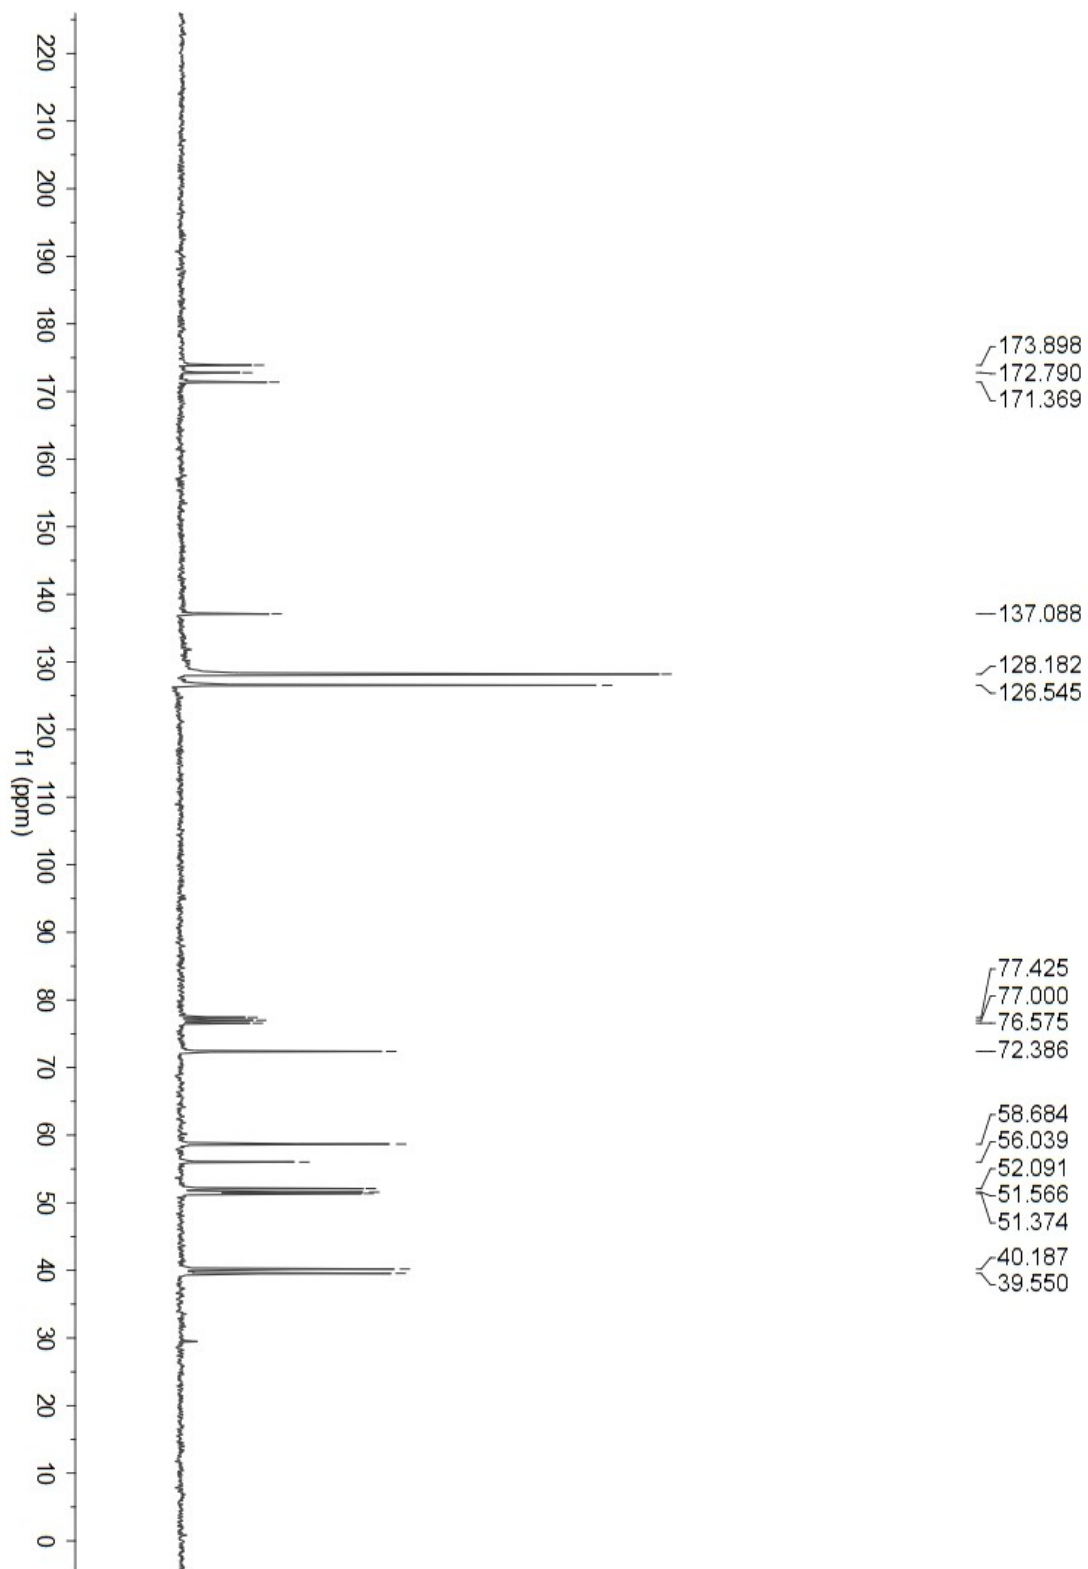

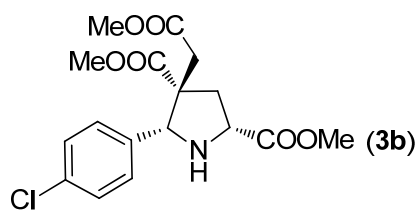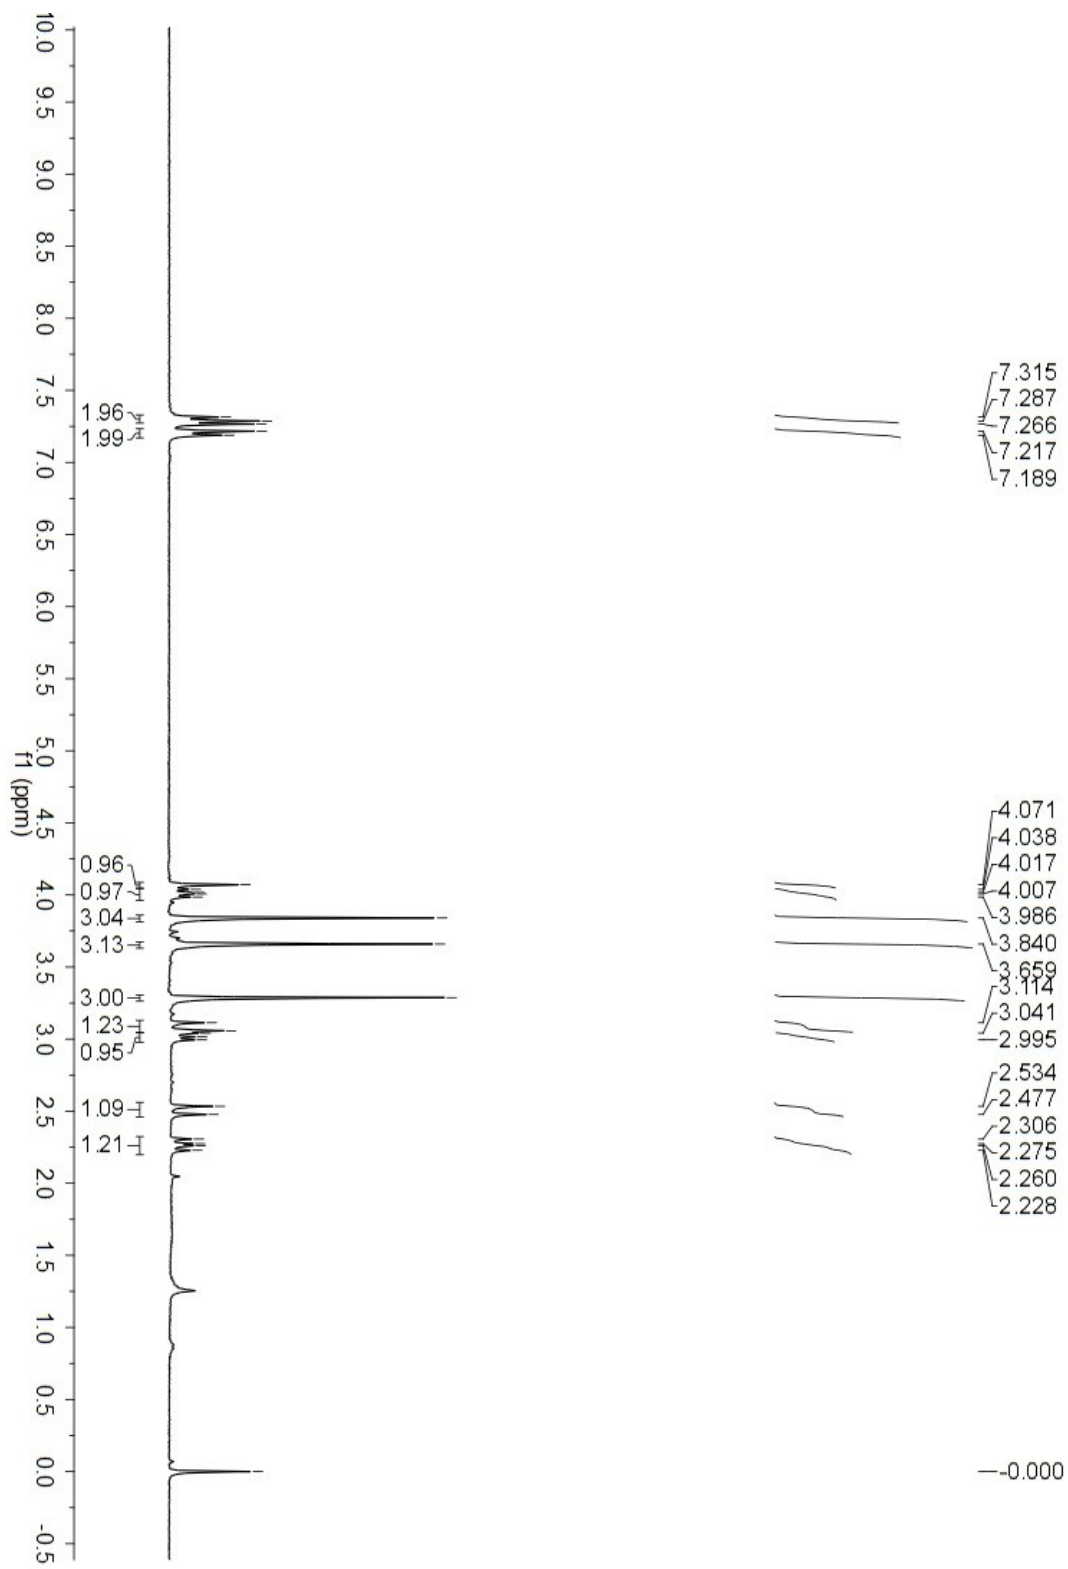

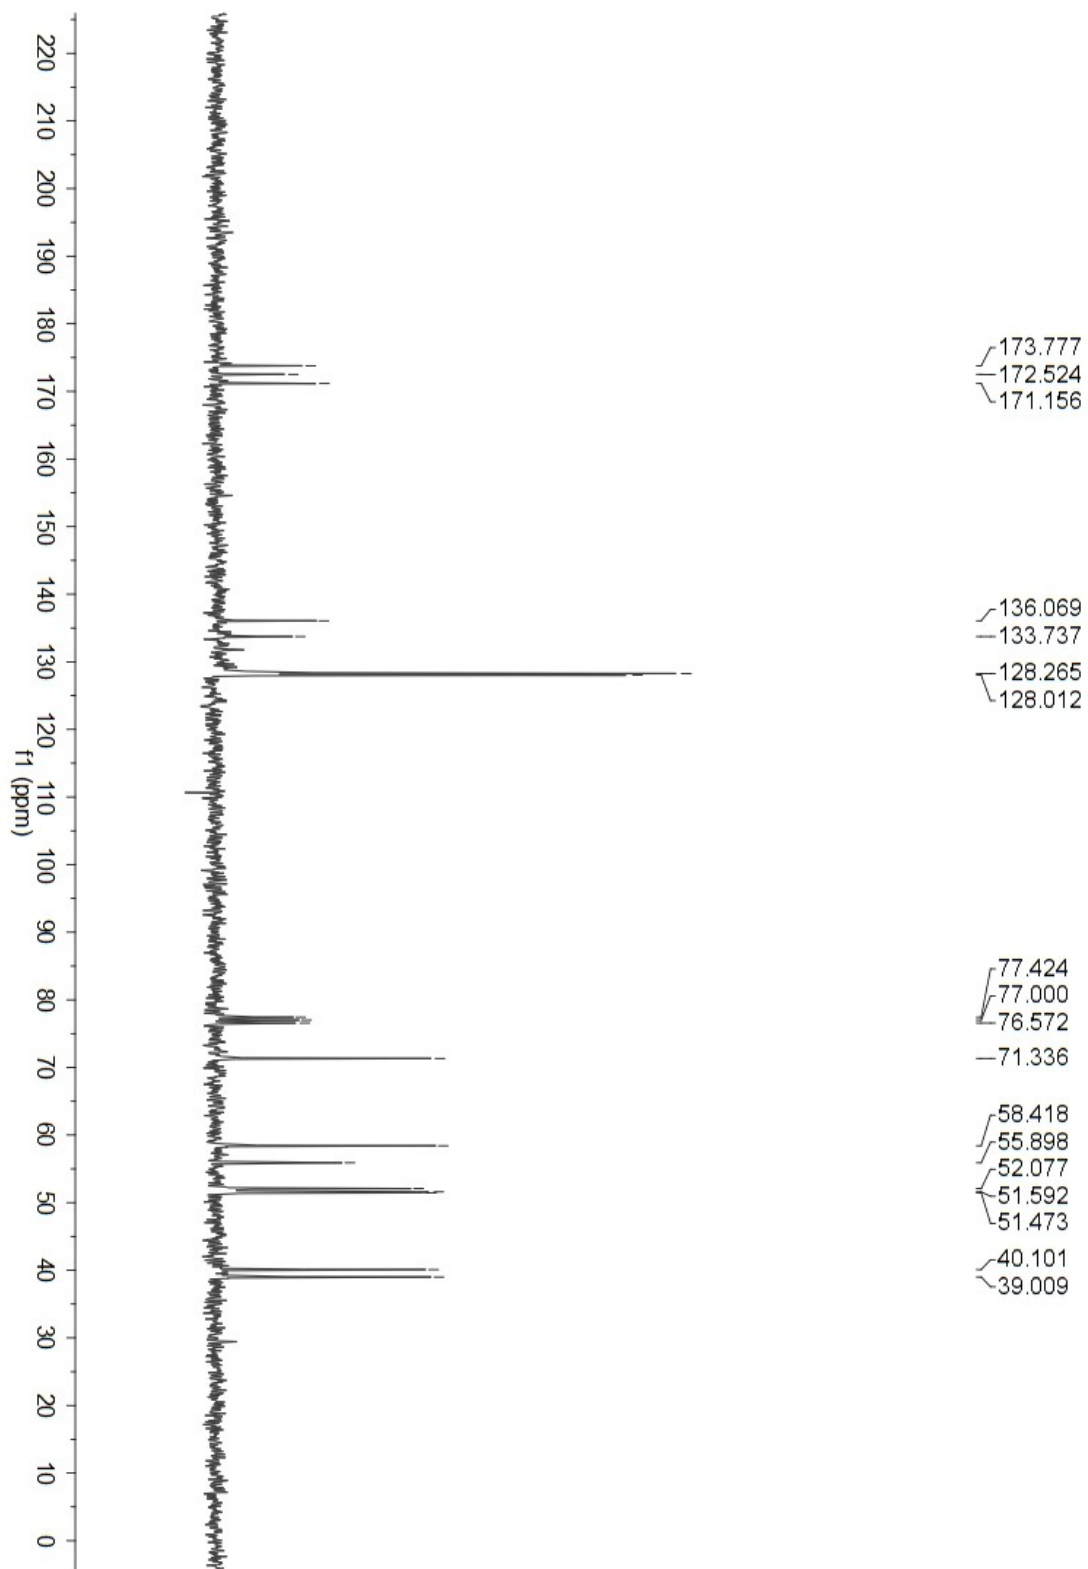

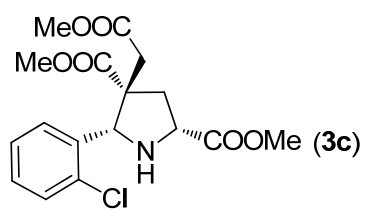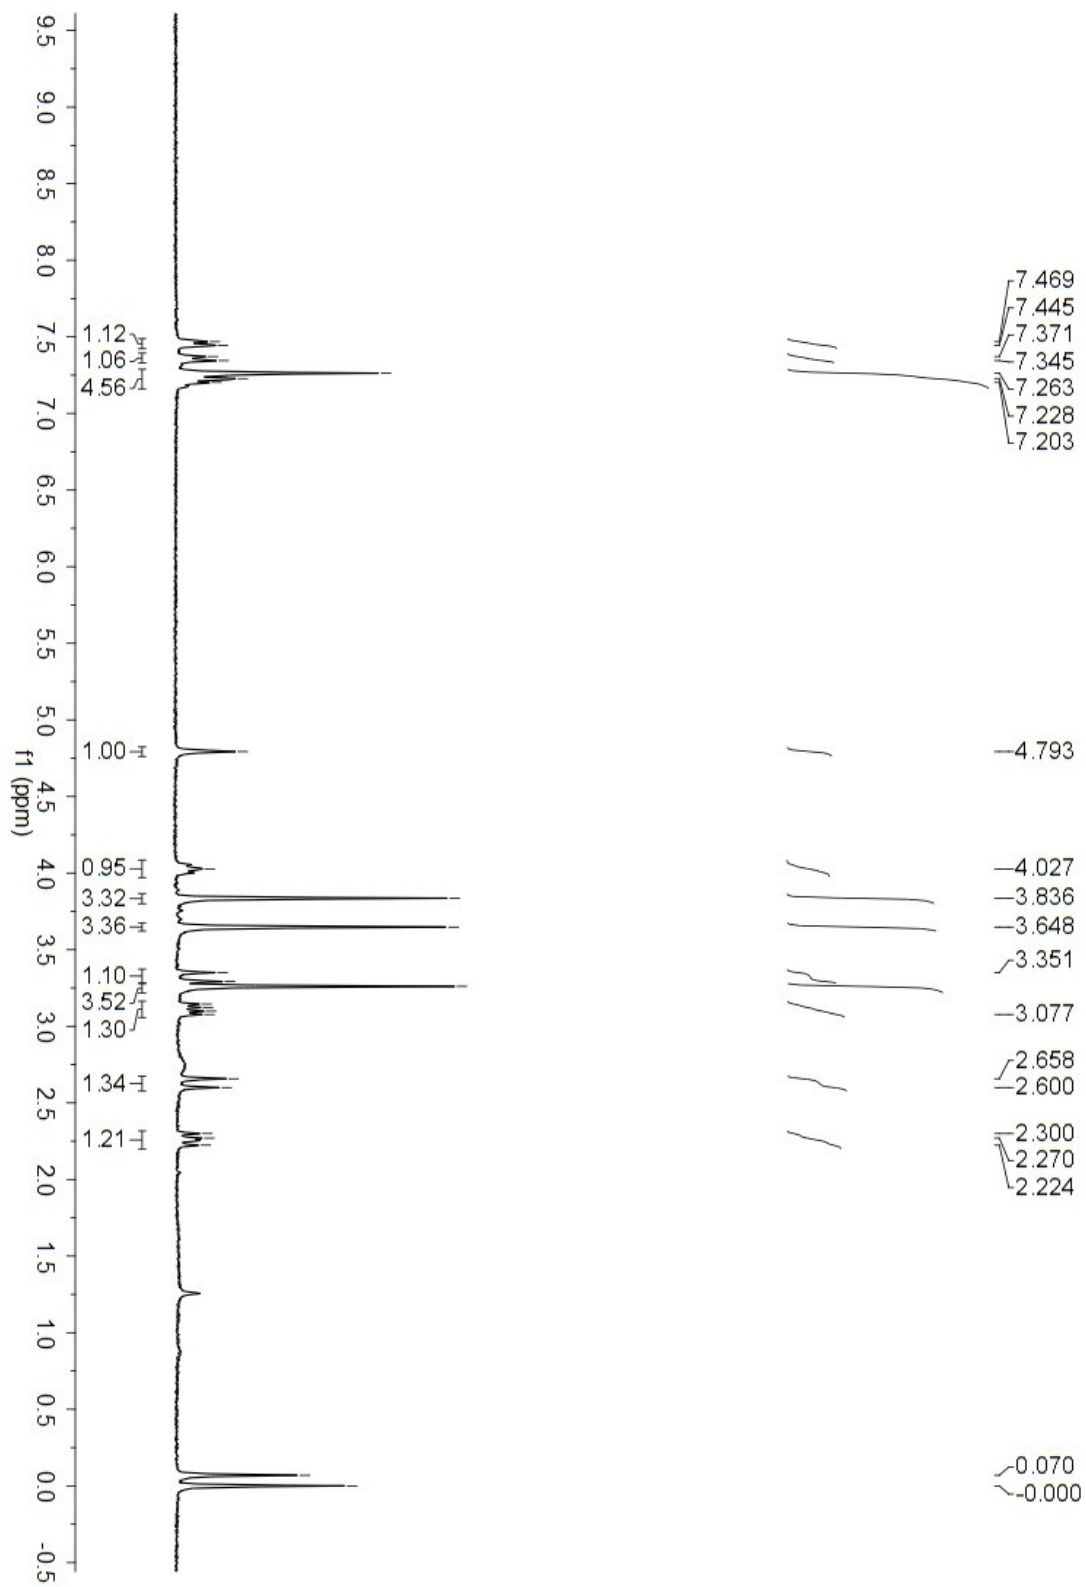

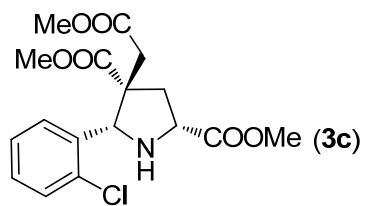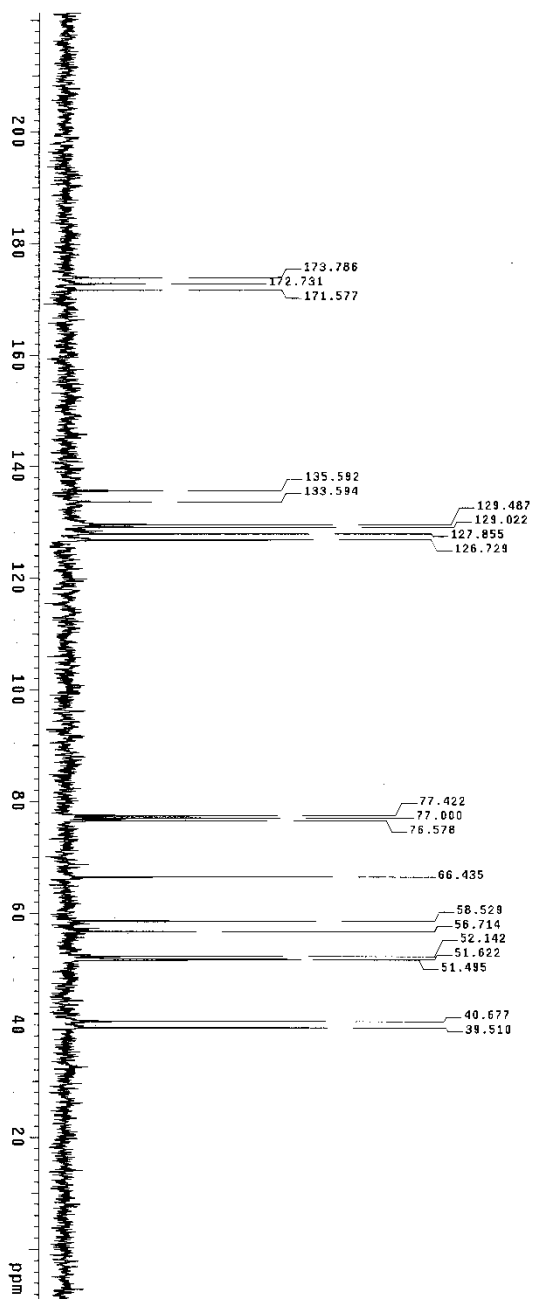

C13-HZ1-9-69C

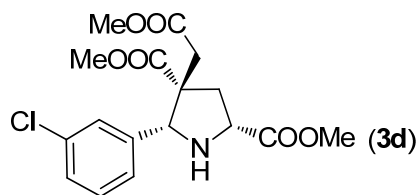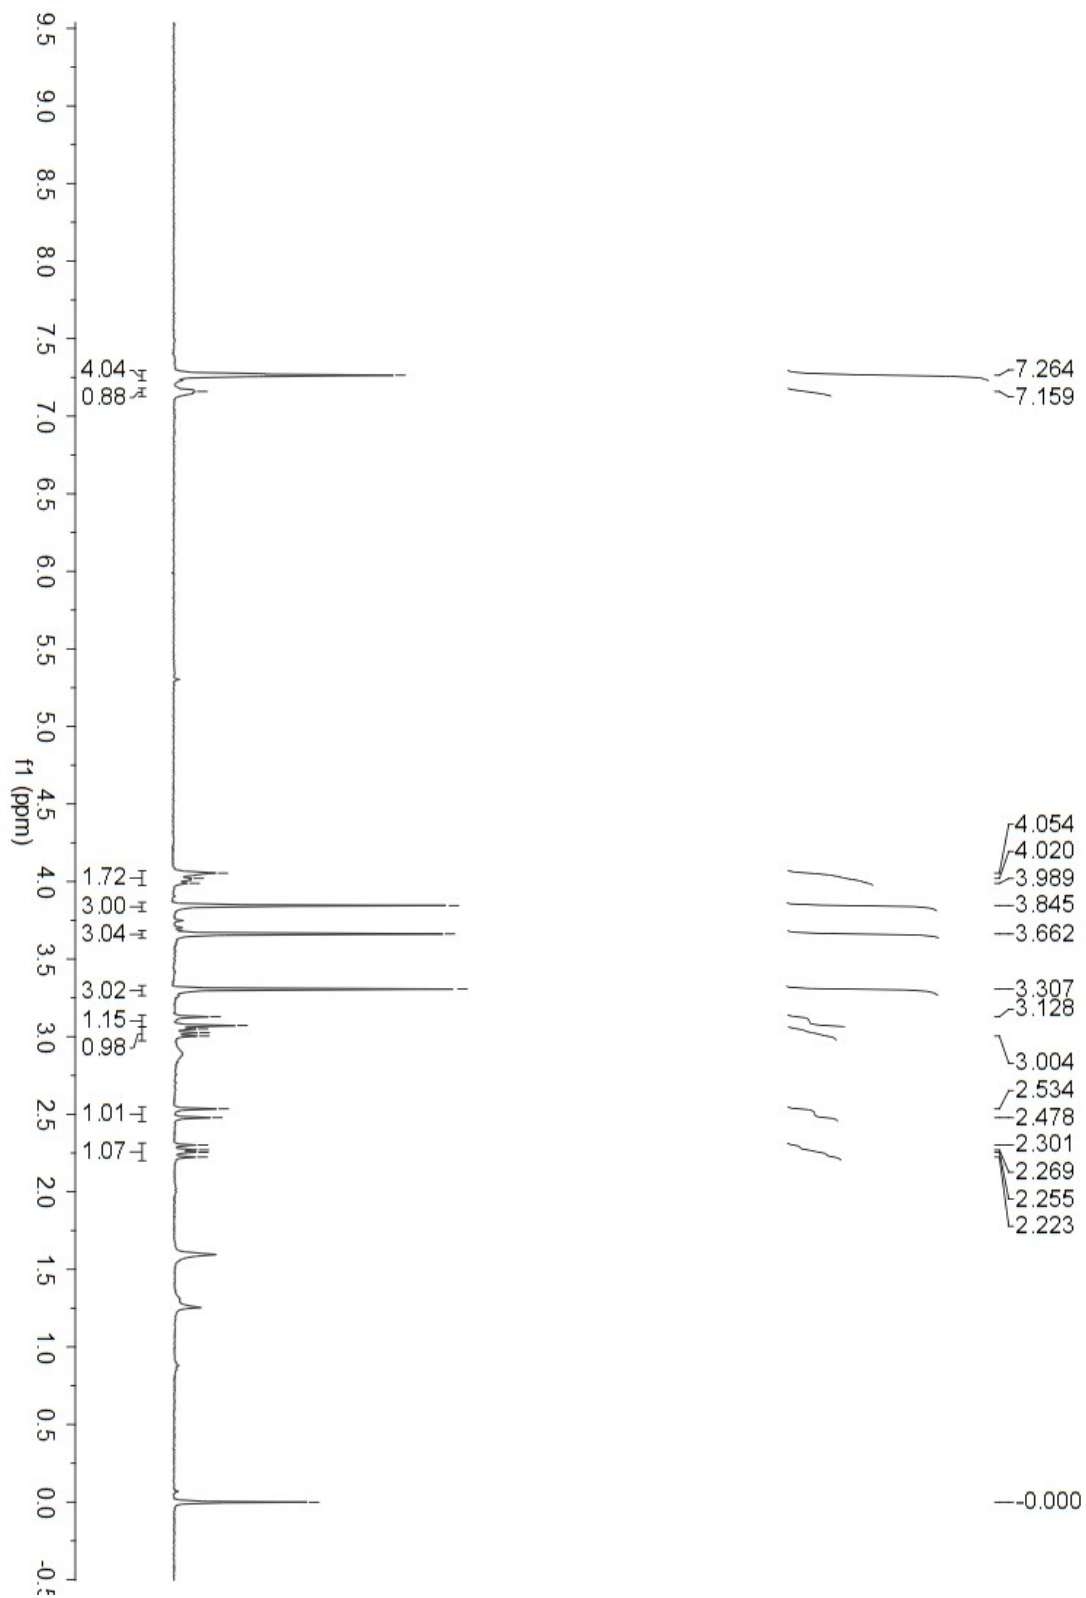



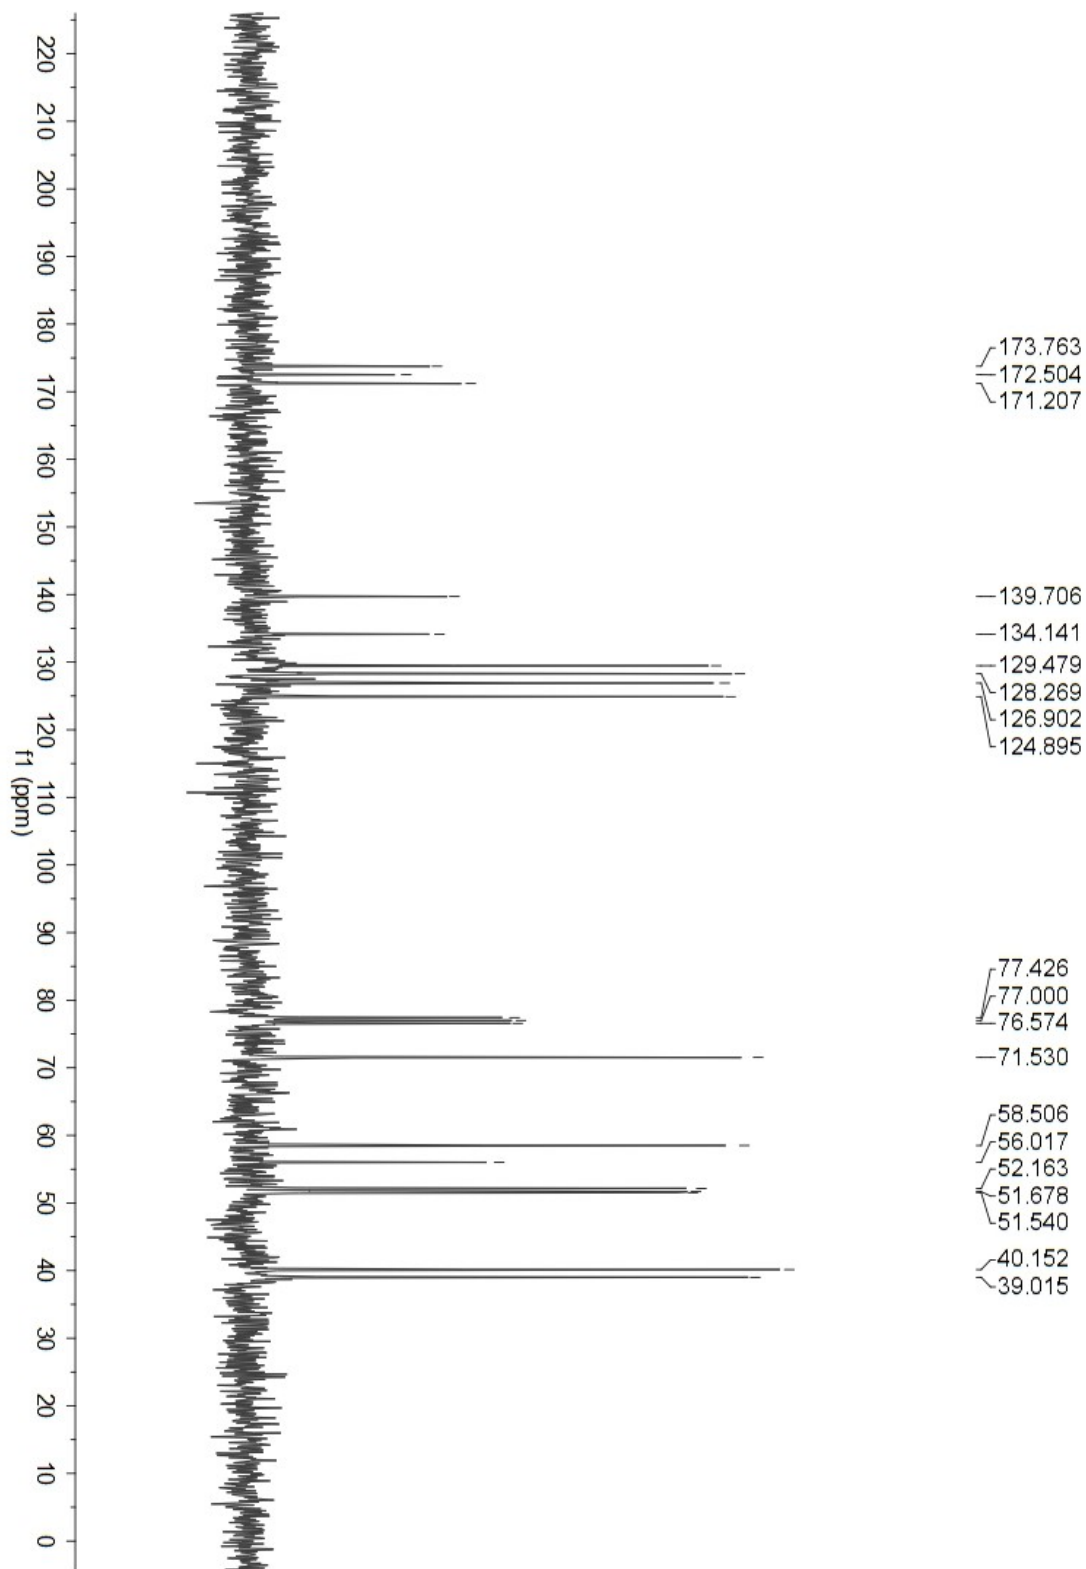

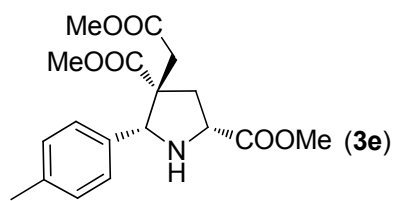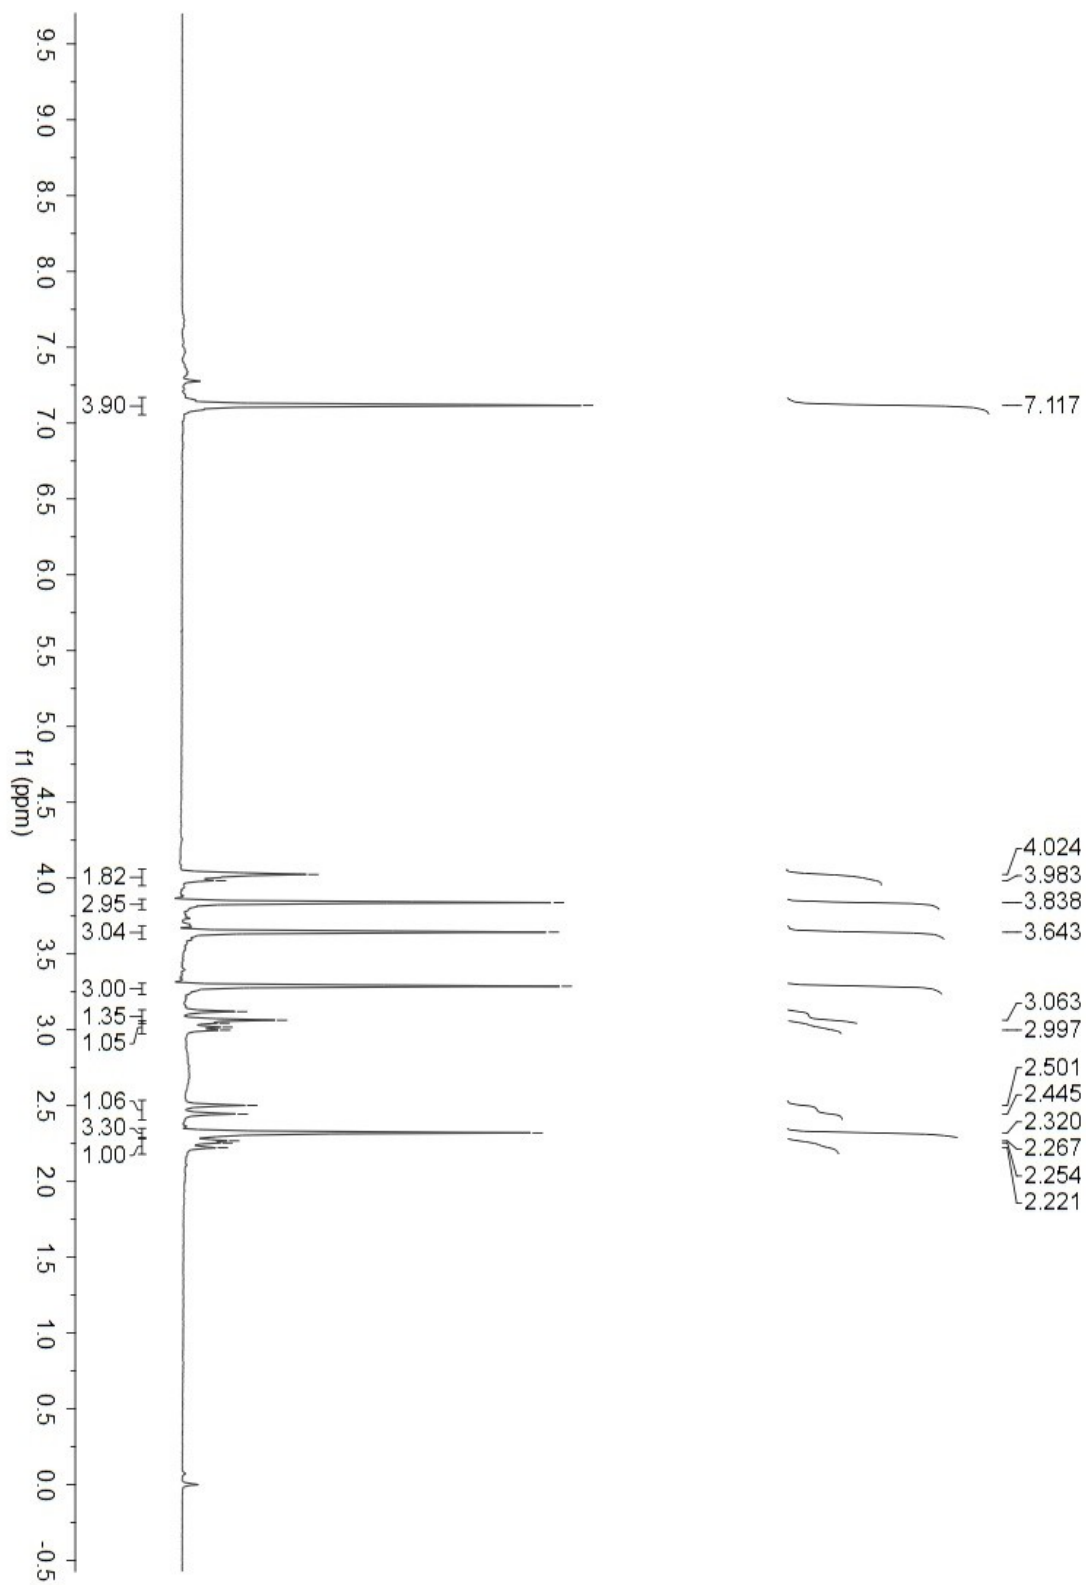

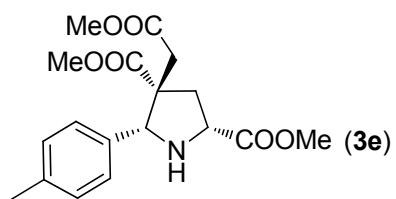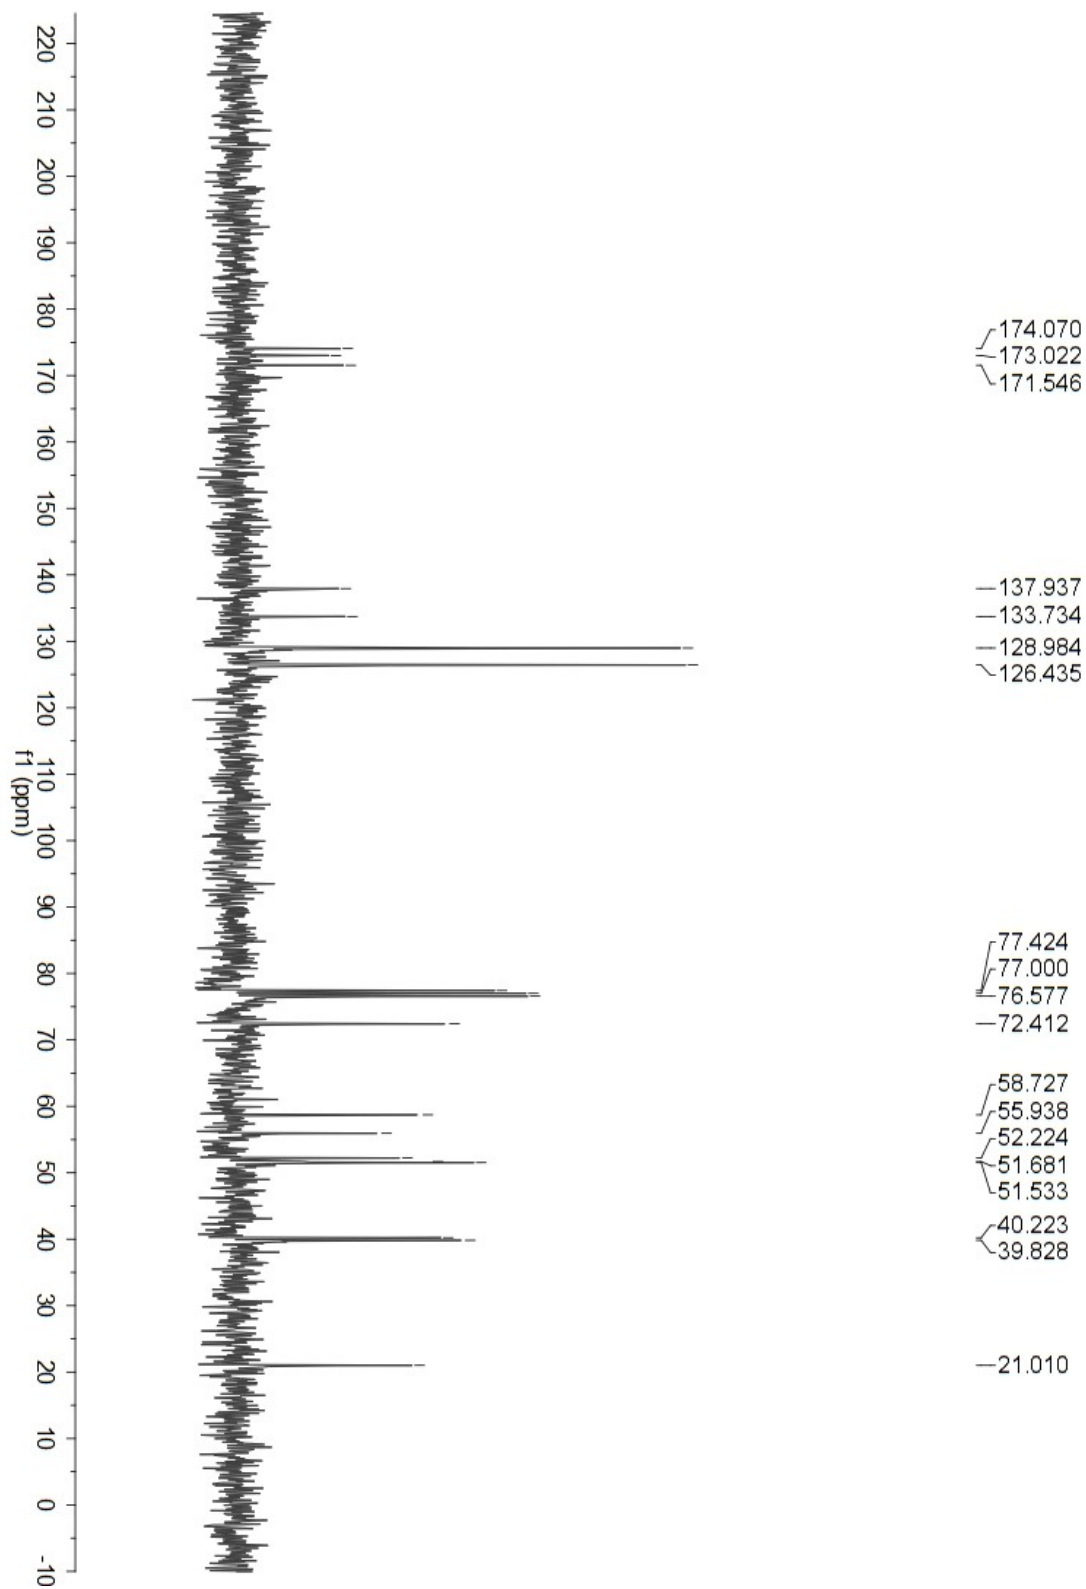

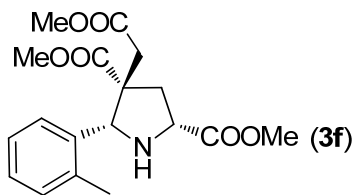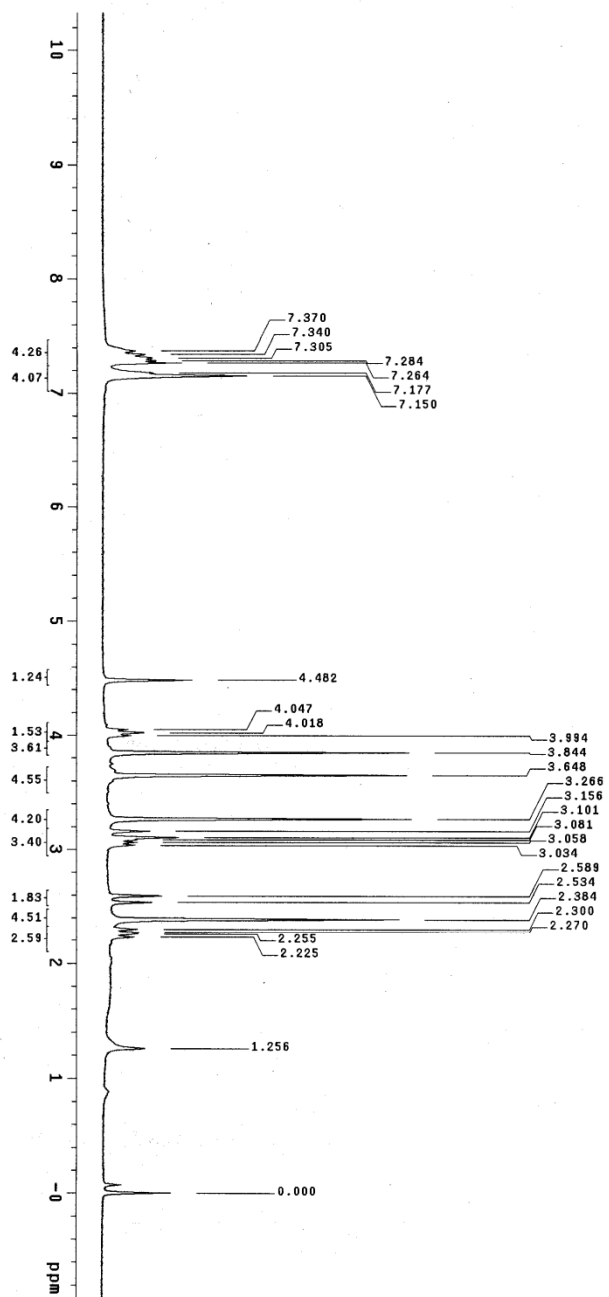

h21-9-63a

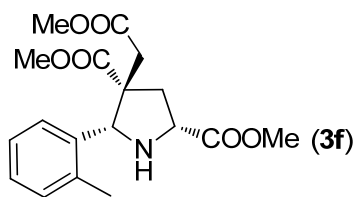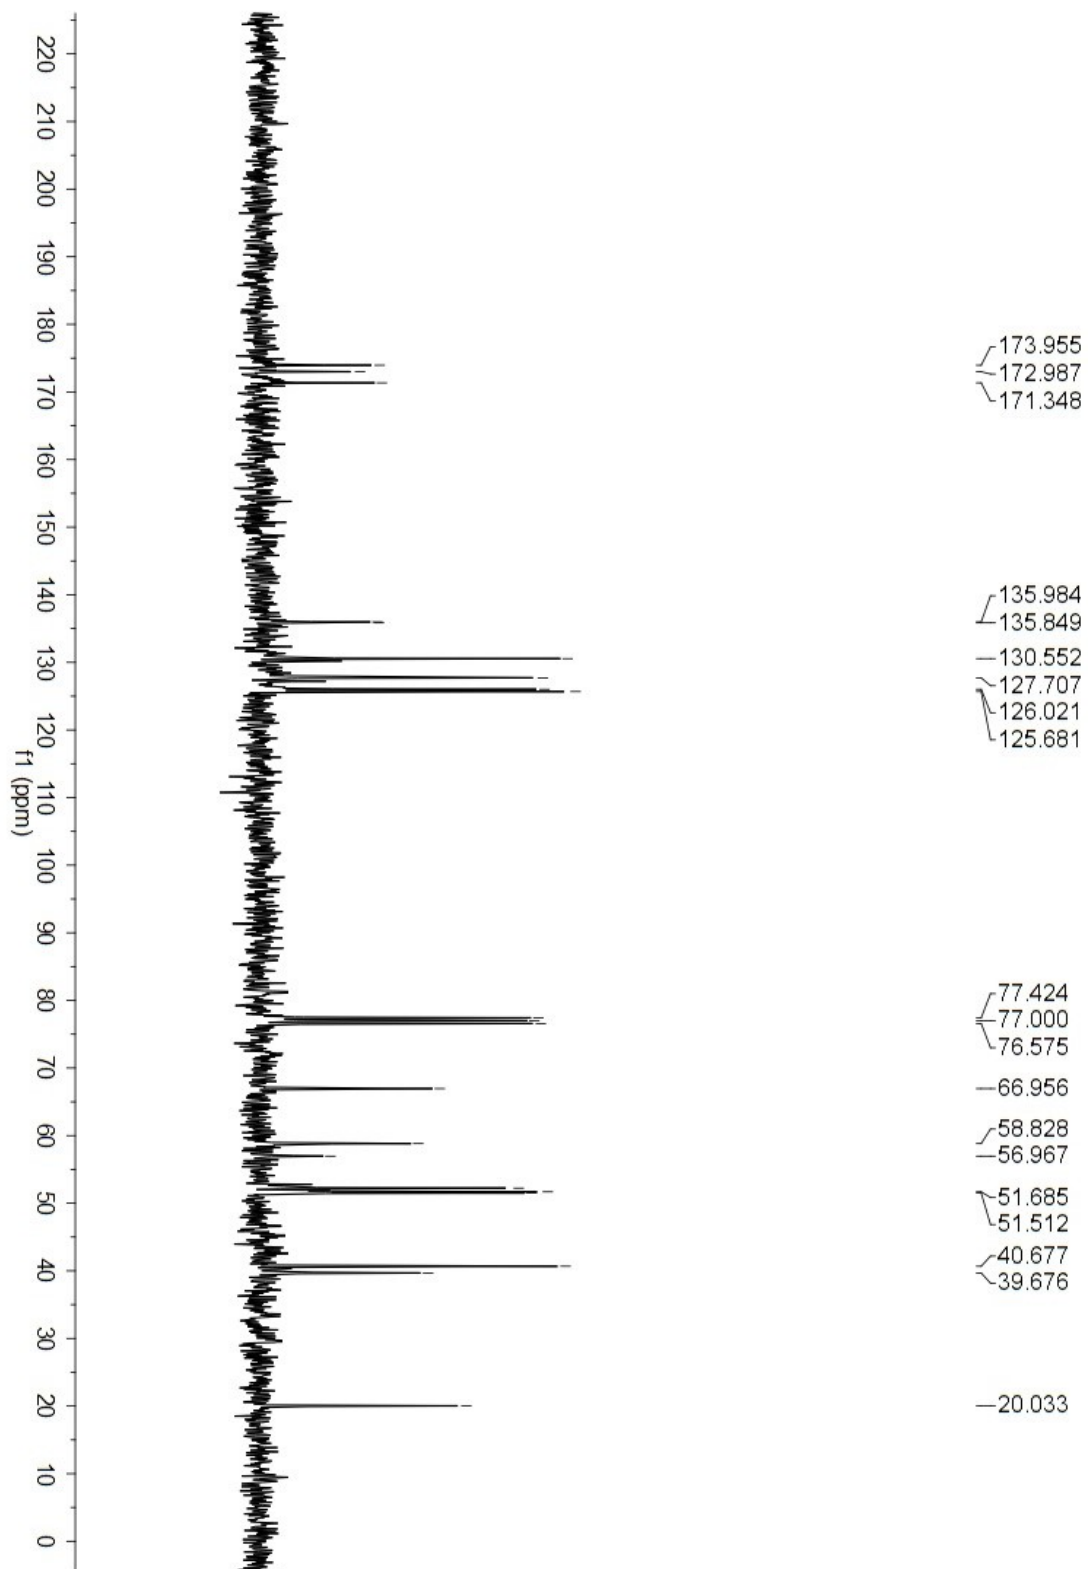

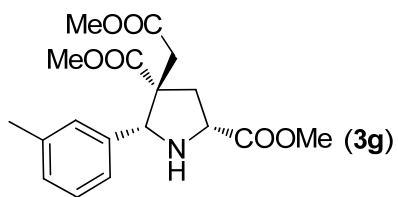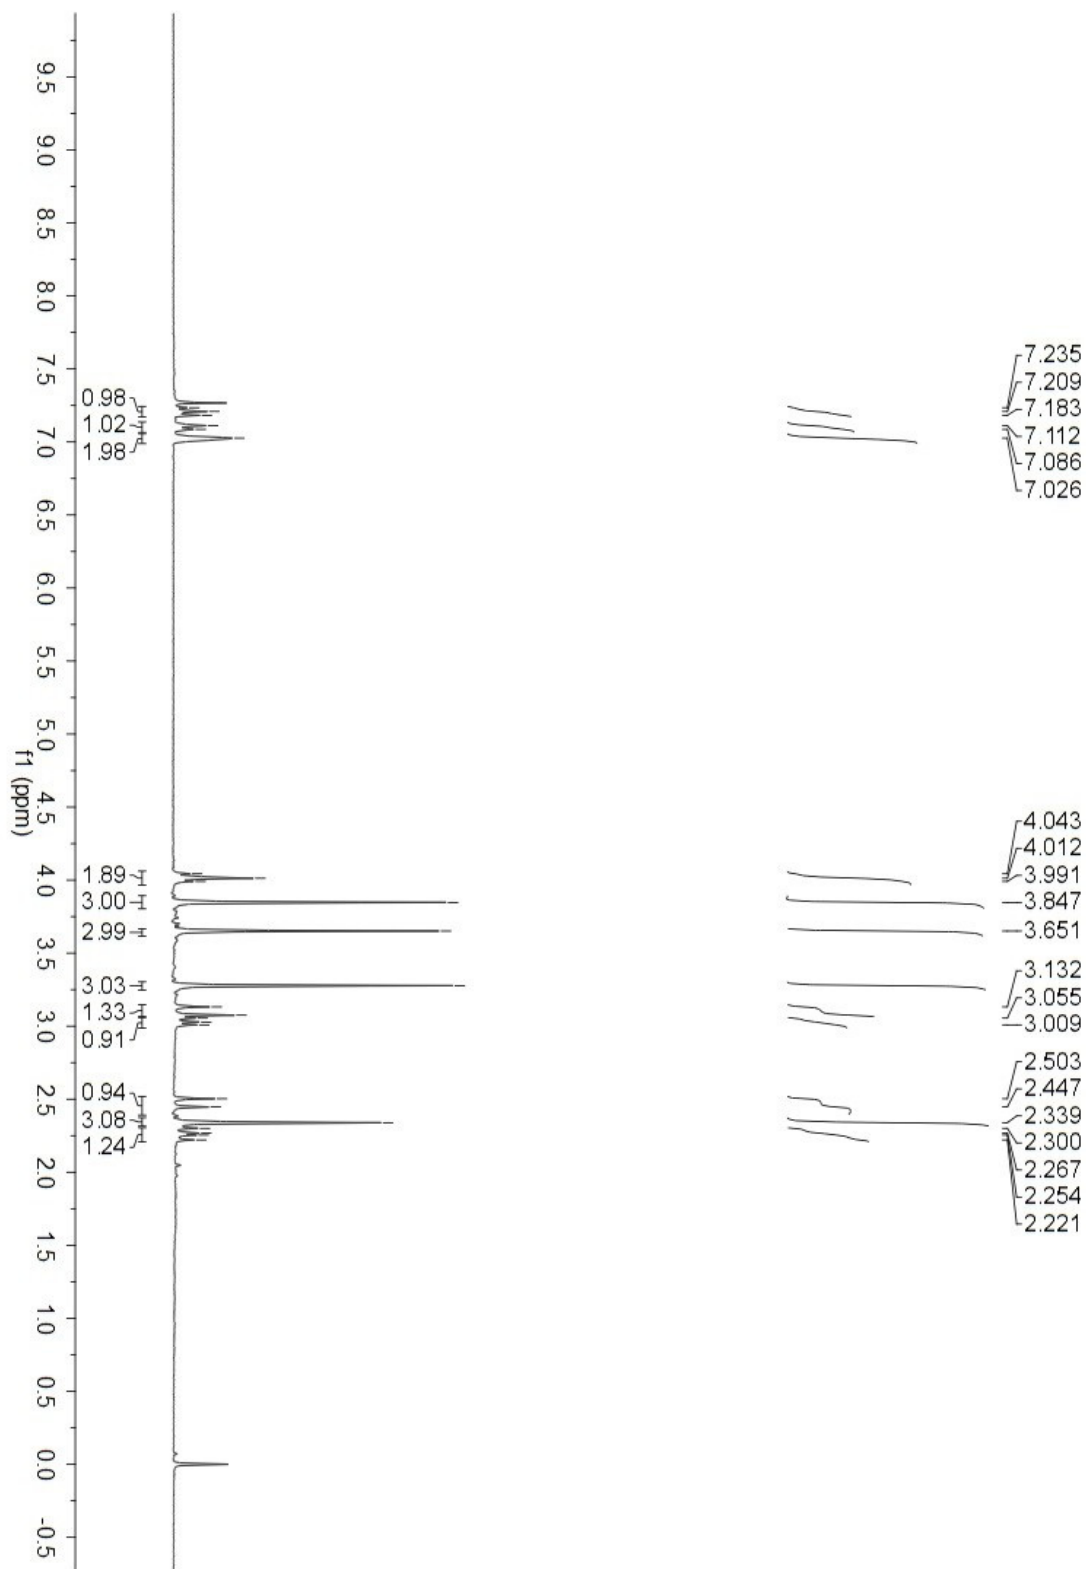

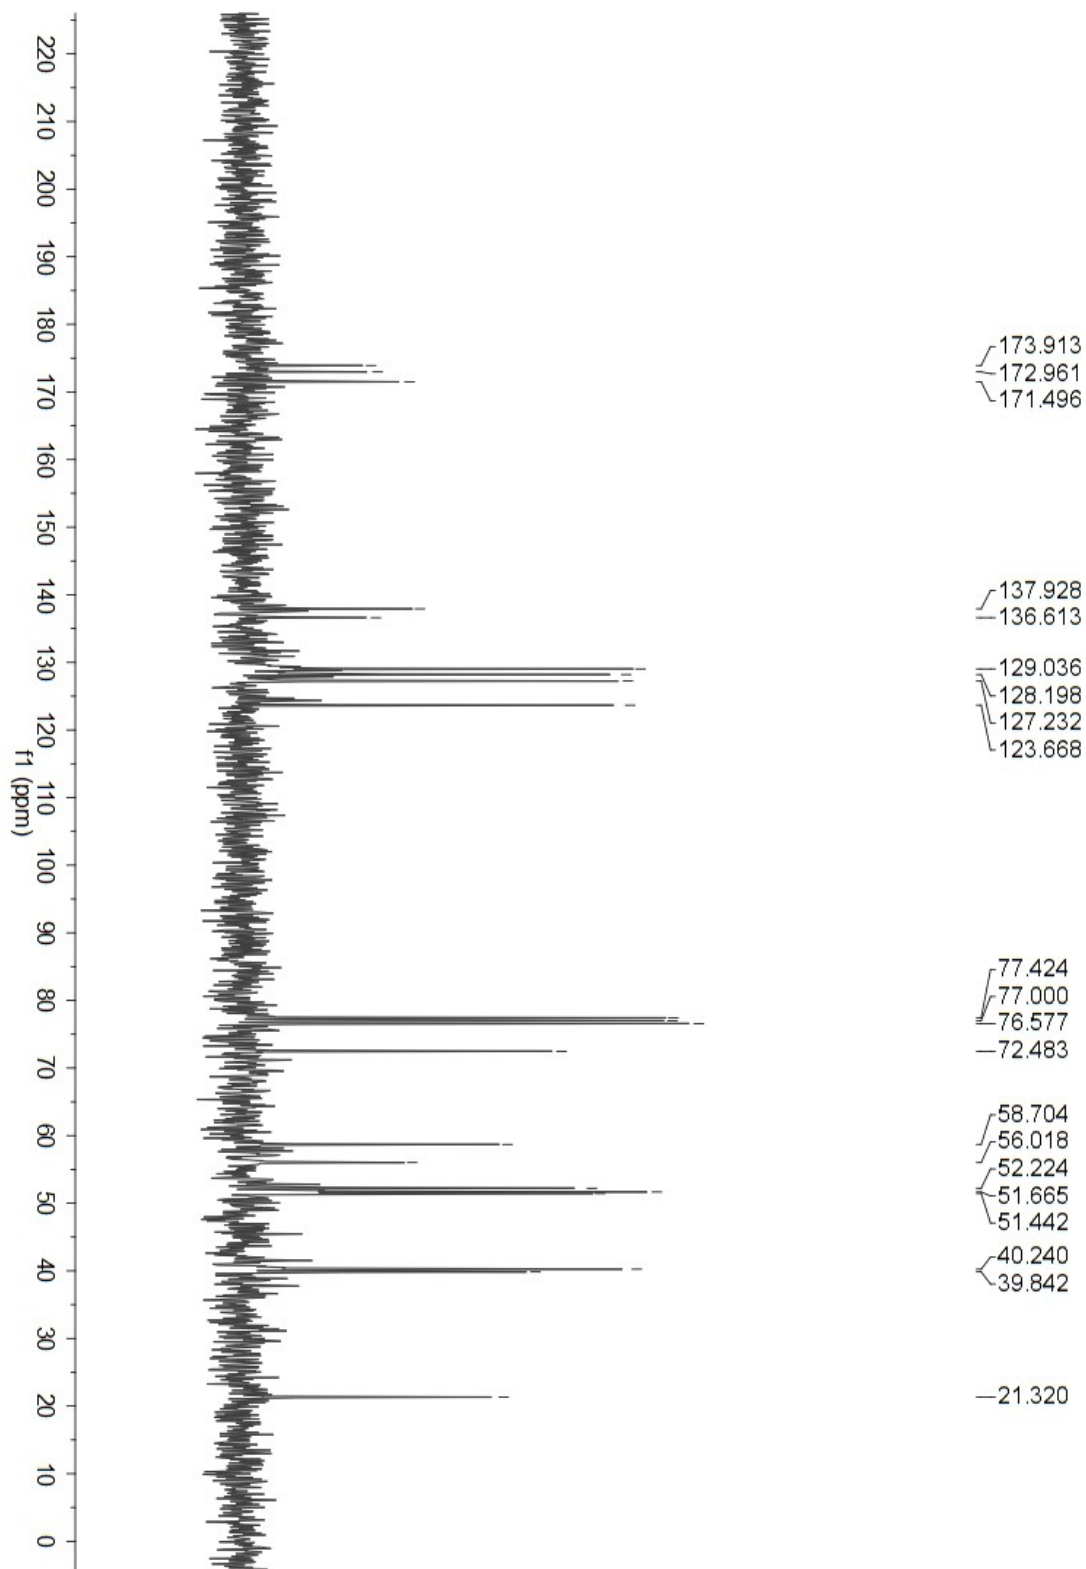







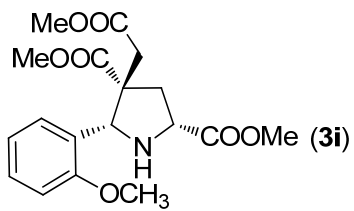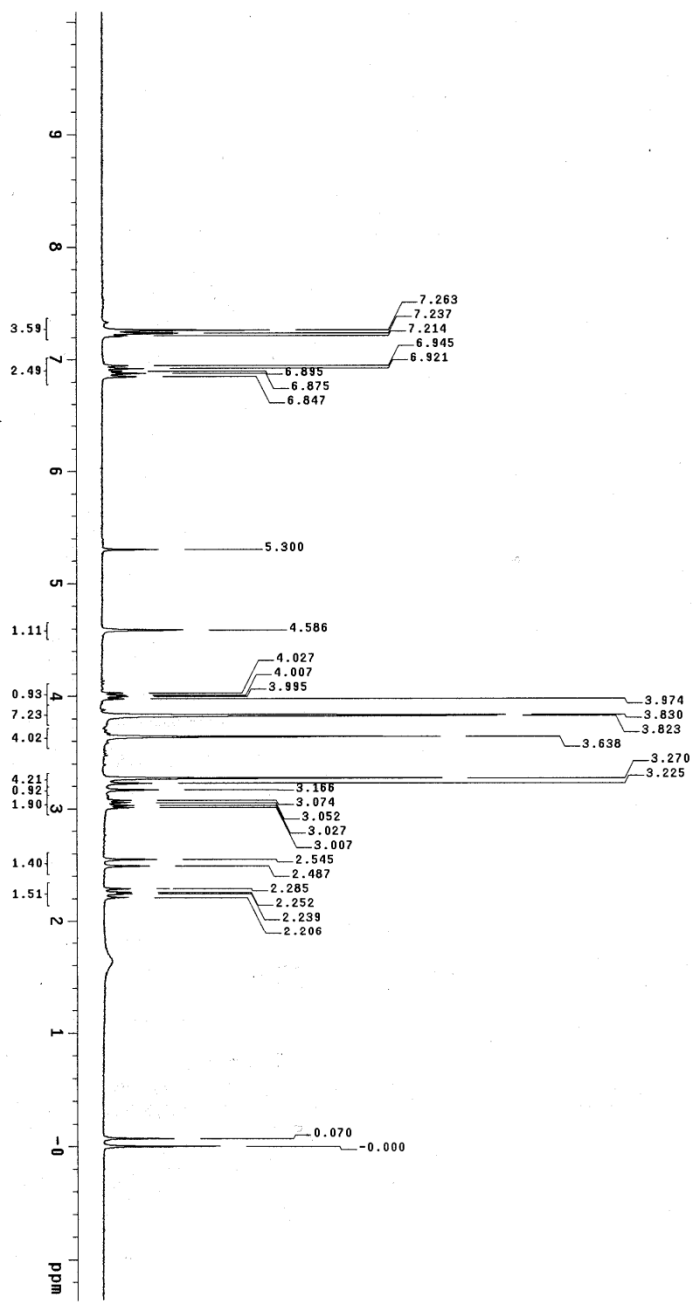

h21-9-63b

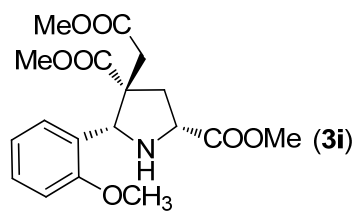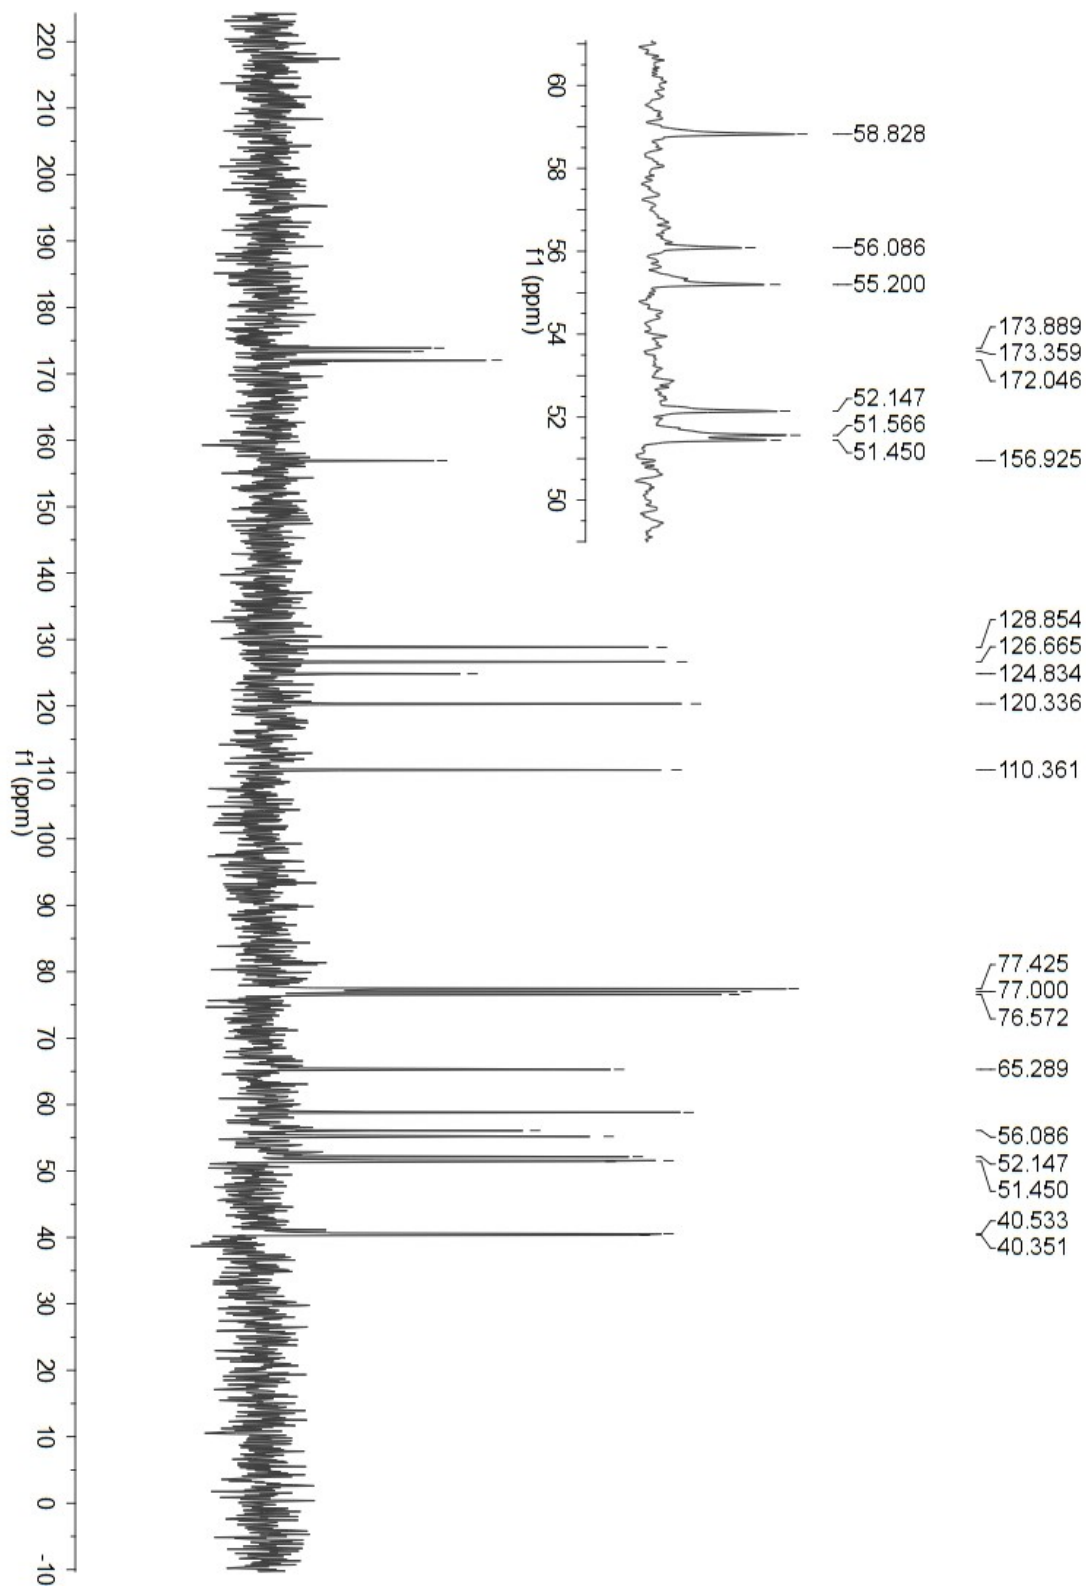

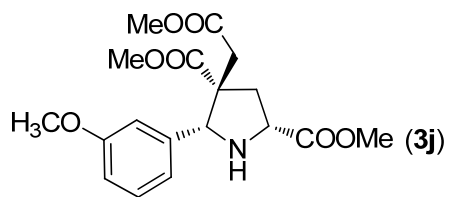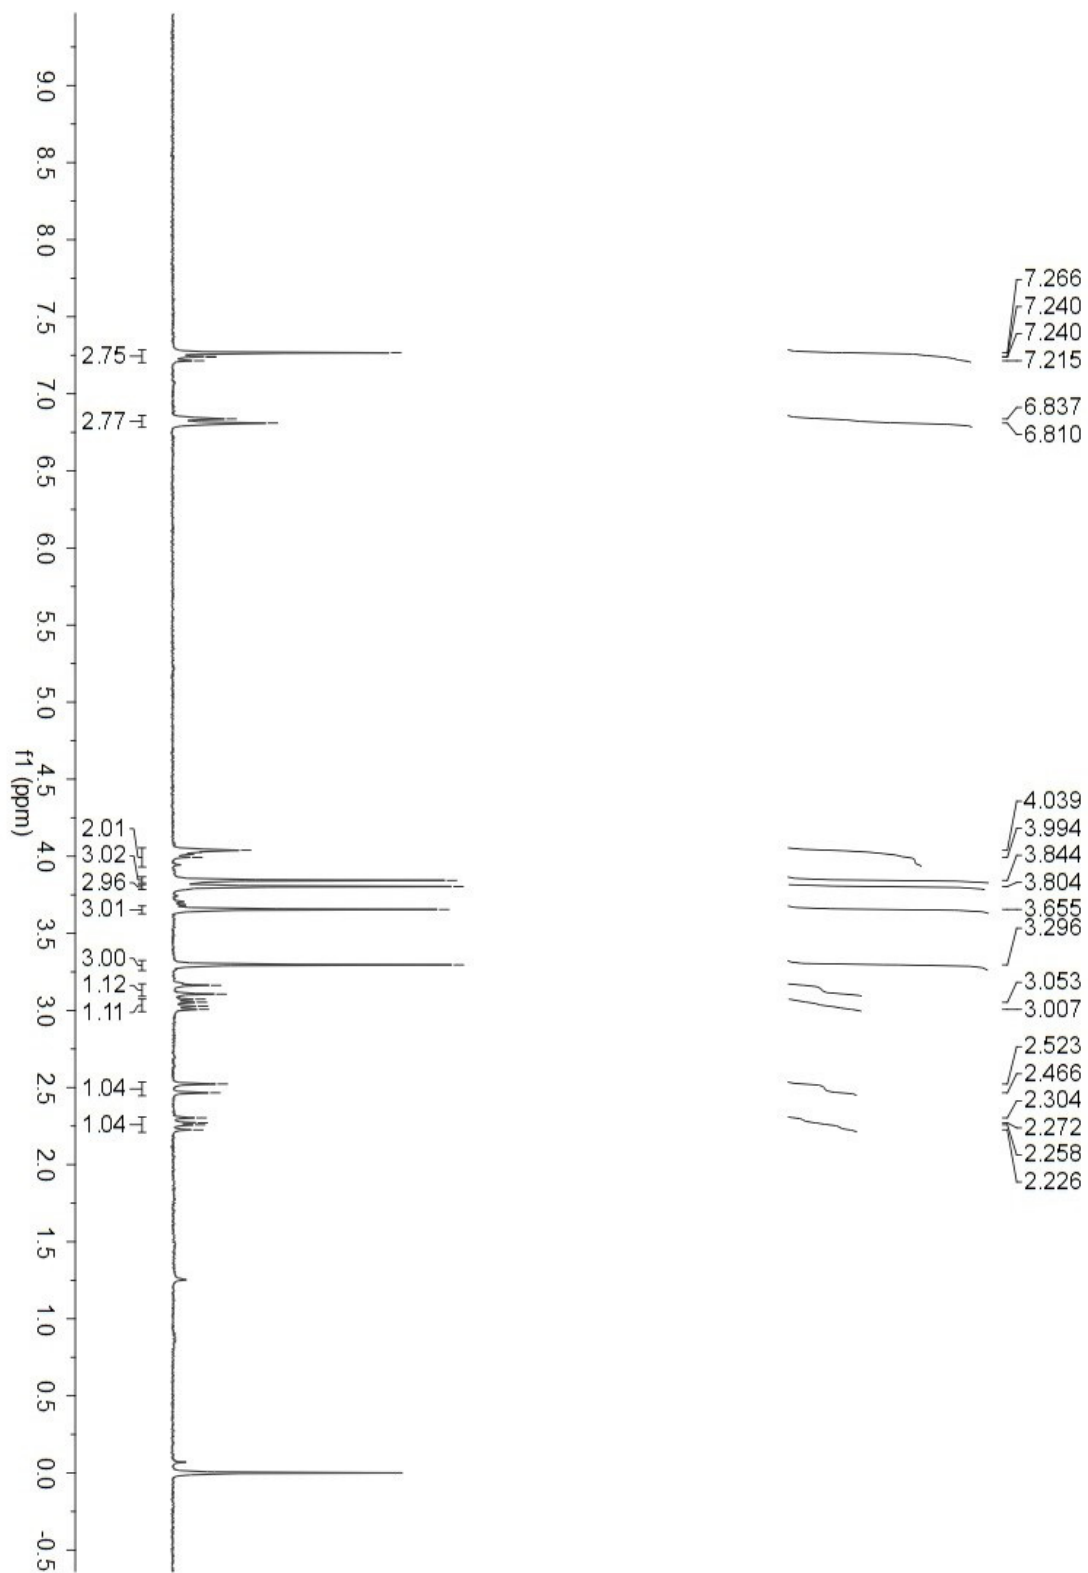

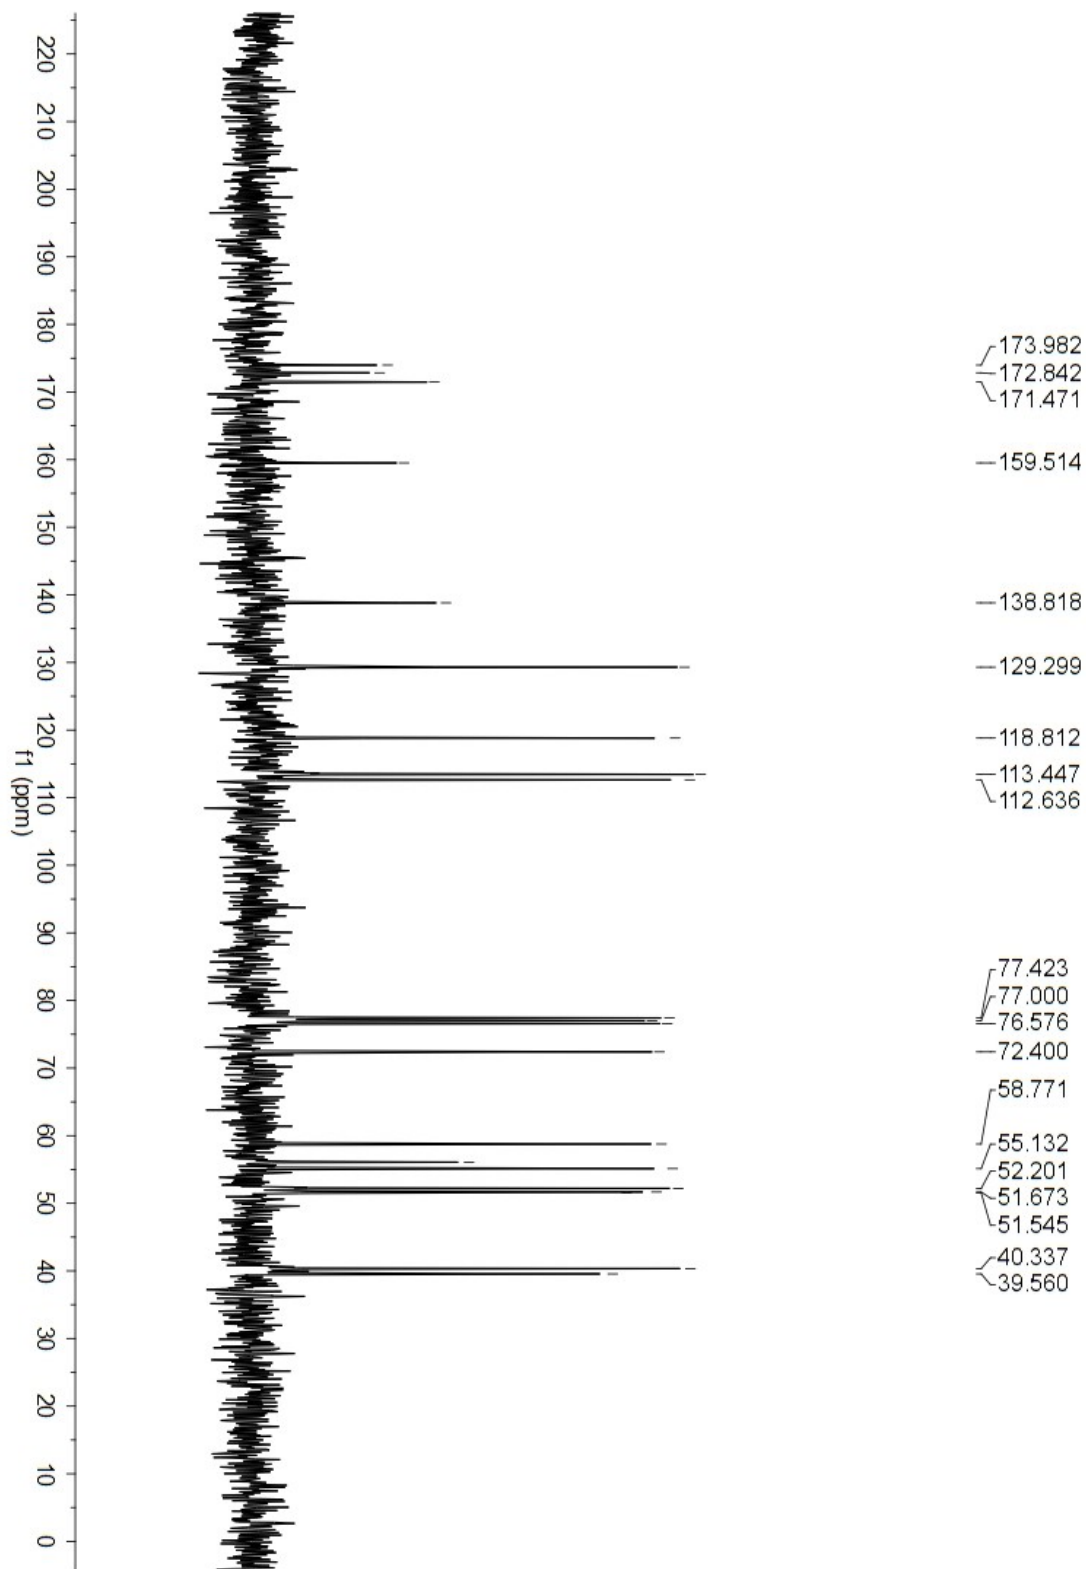

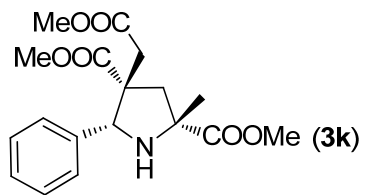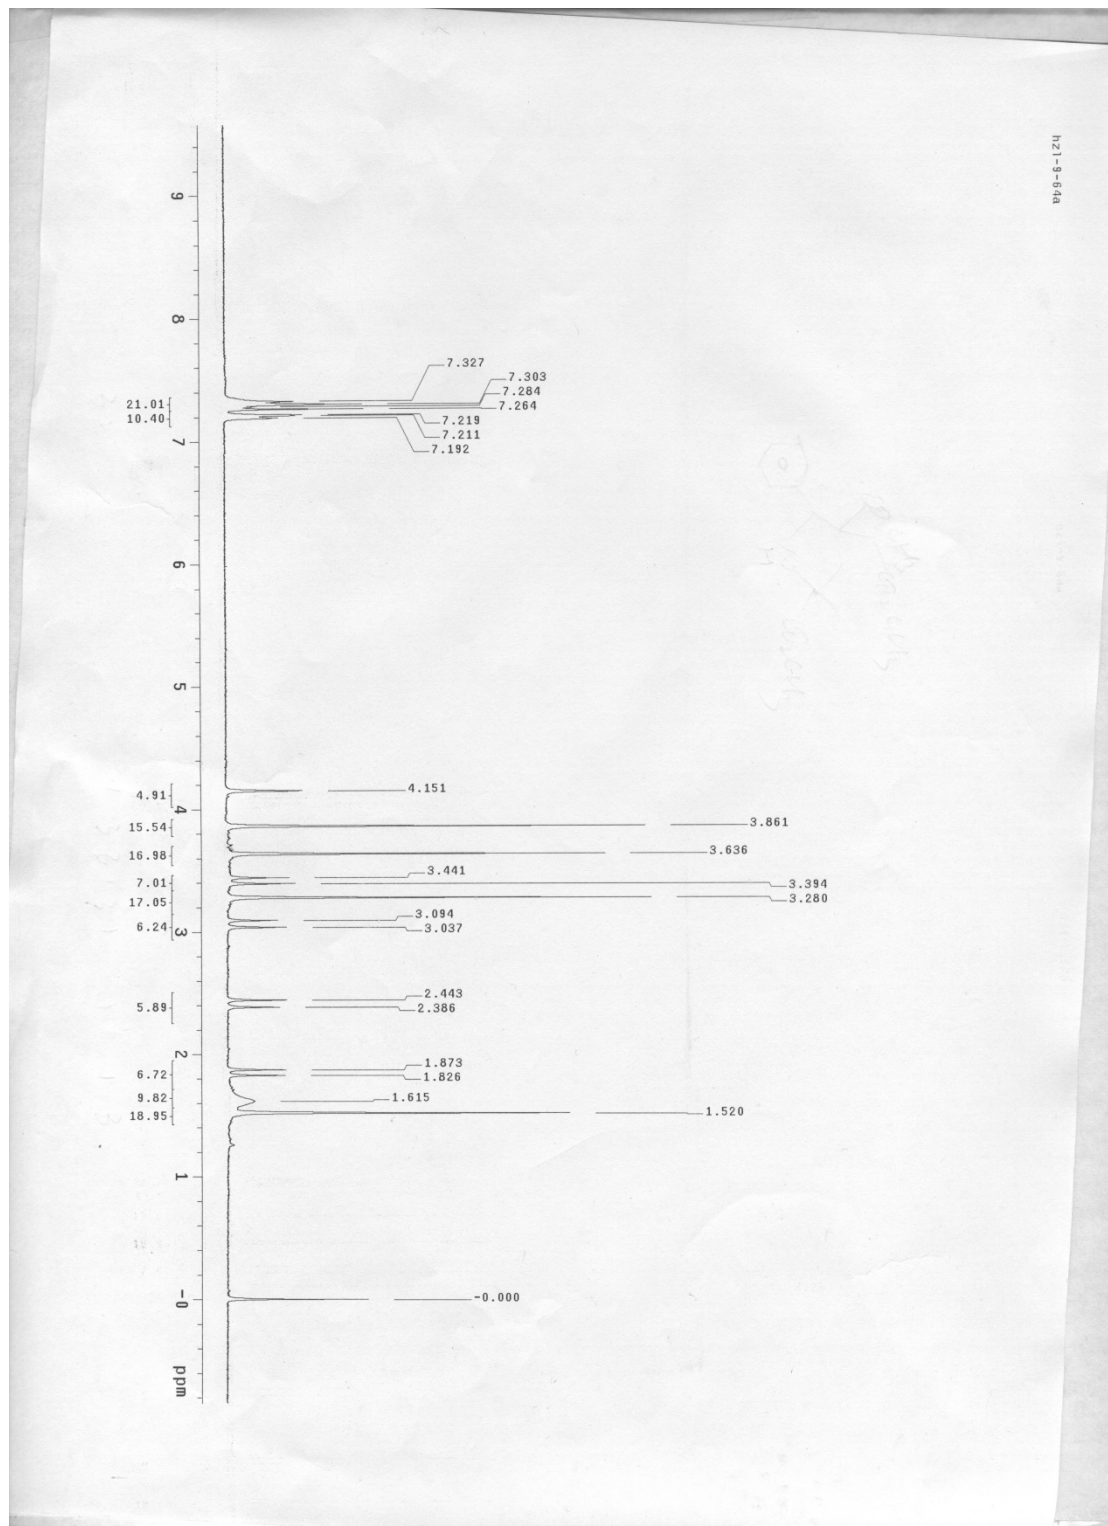

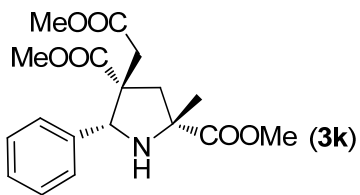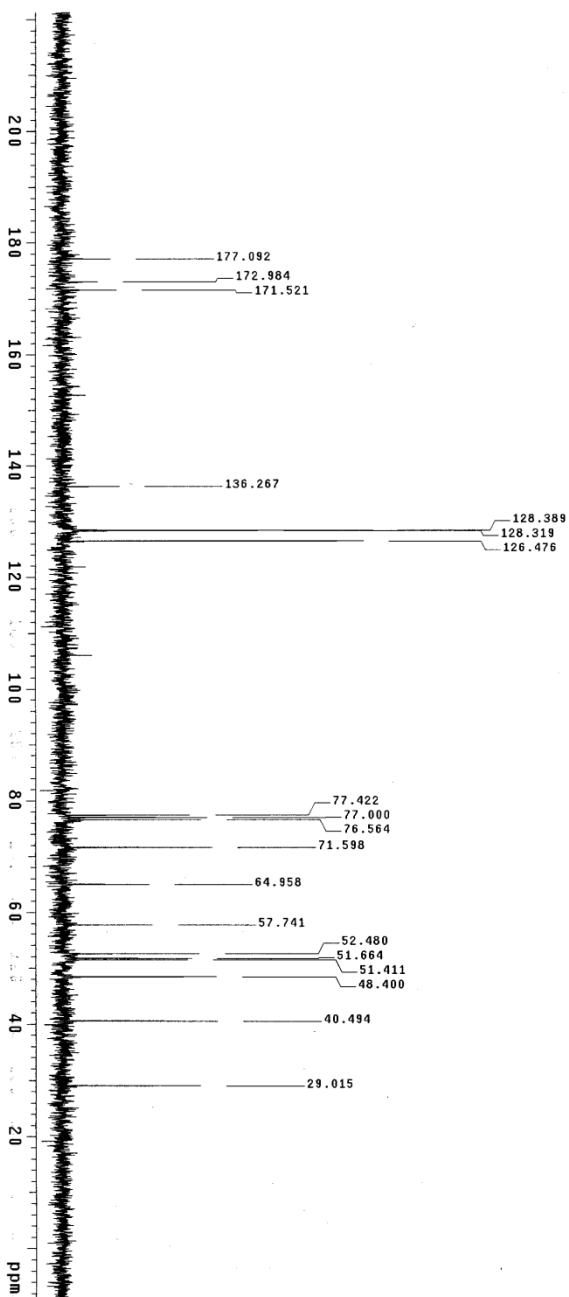

h21-9-64a  
 Solvent: CDCl3  
 Ambient temperature  
 Mercury-30088 "mercury300"  
 Relax delay 1.000 sec  
 Pulse 28.0 deg/sec  
 Acq 4.00 sec  
 Width 17391.3 Hz  
 144 repetitions  
 OBSERVE C13 75.4552789 MHz  
 PULSEPROG zgpg30  
 Power 59 db  
 continuously on  
 WALTZ-16 modulated  
 with 2000 Hz  
 Line Broadening 2.0 Hz  
 FT size 32758  
 Total time 1 hr, 55 min, 40 sec

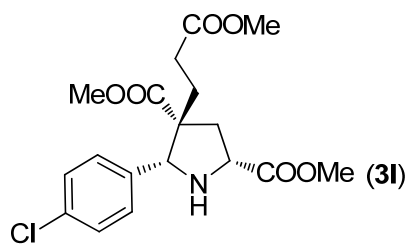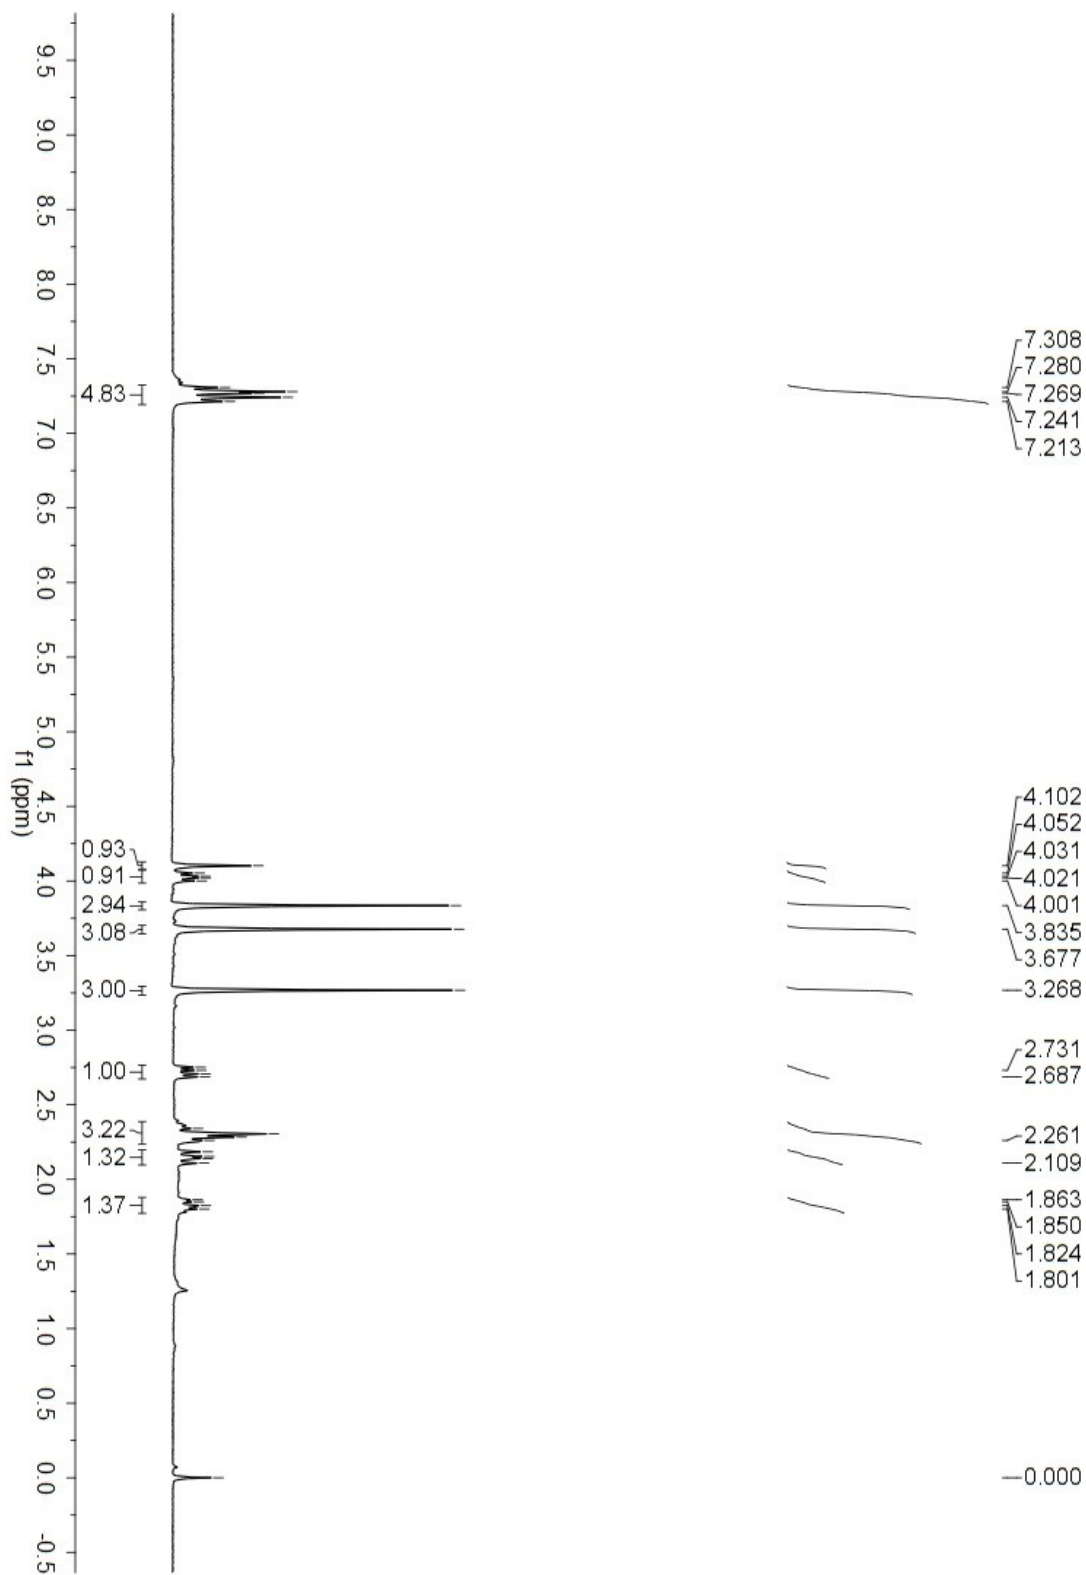



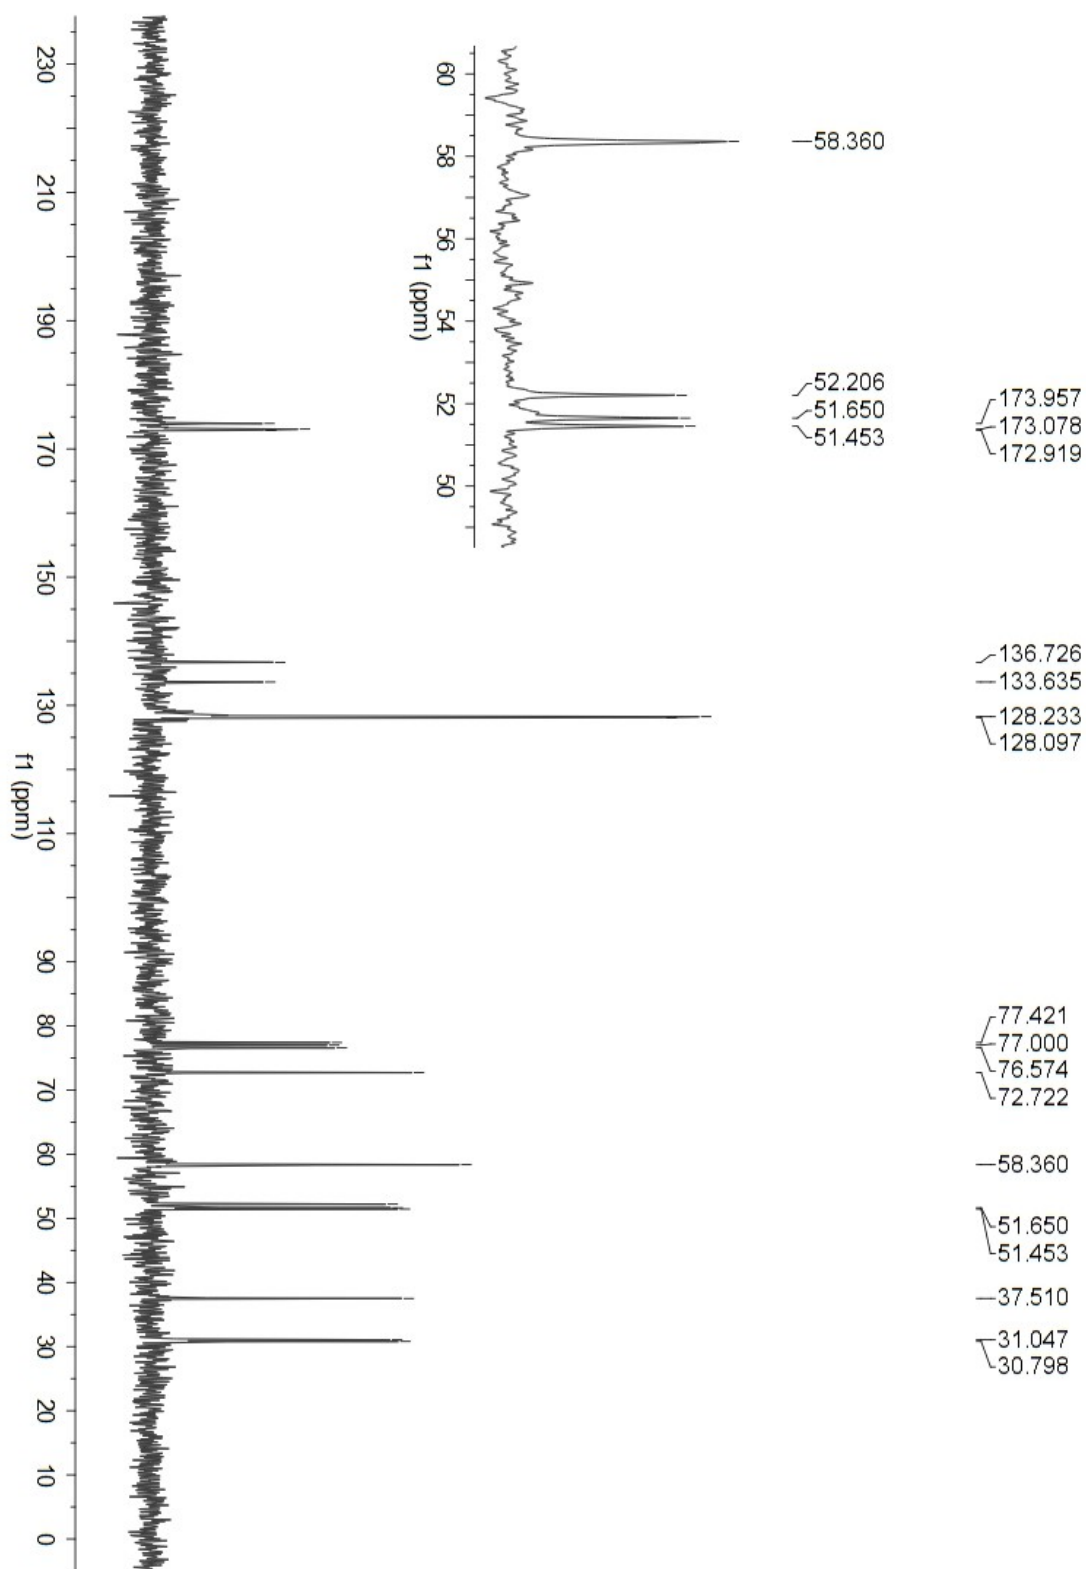

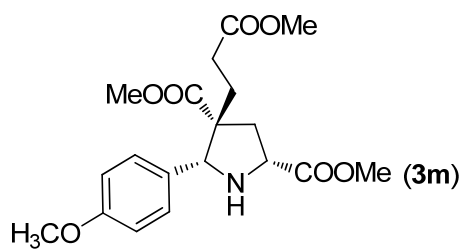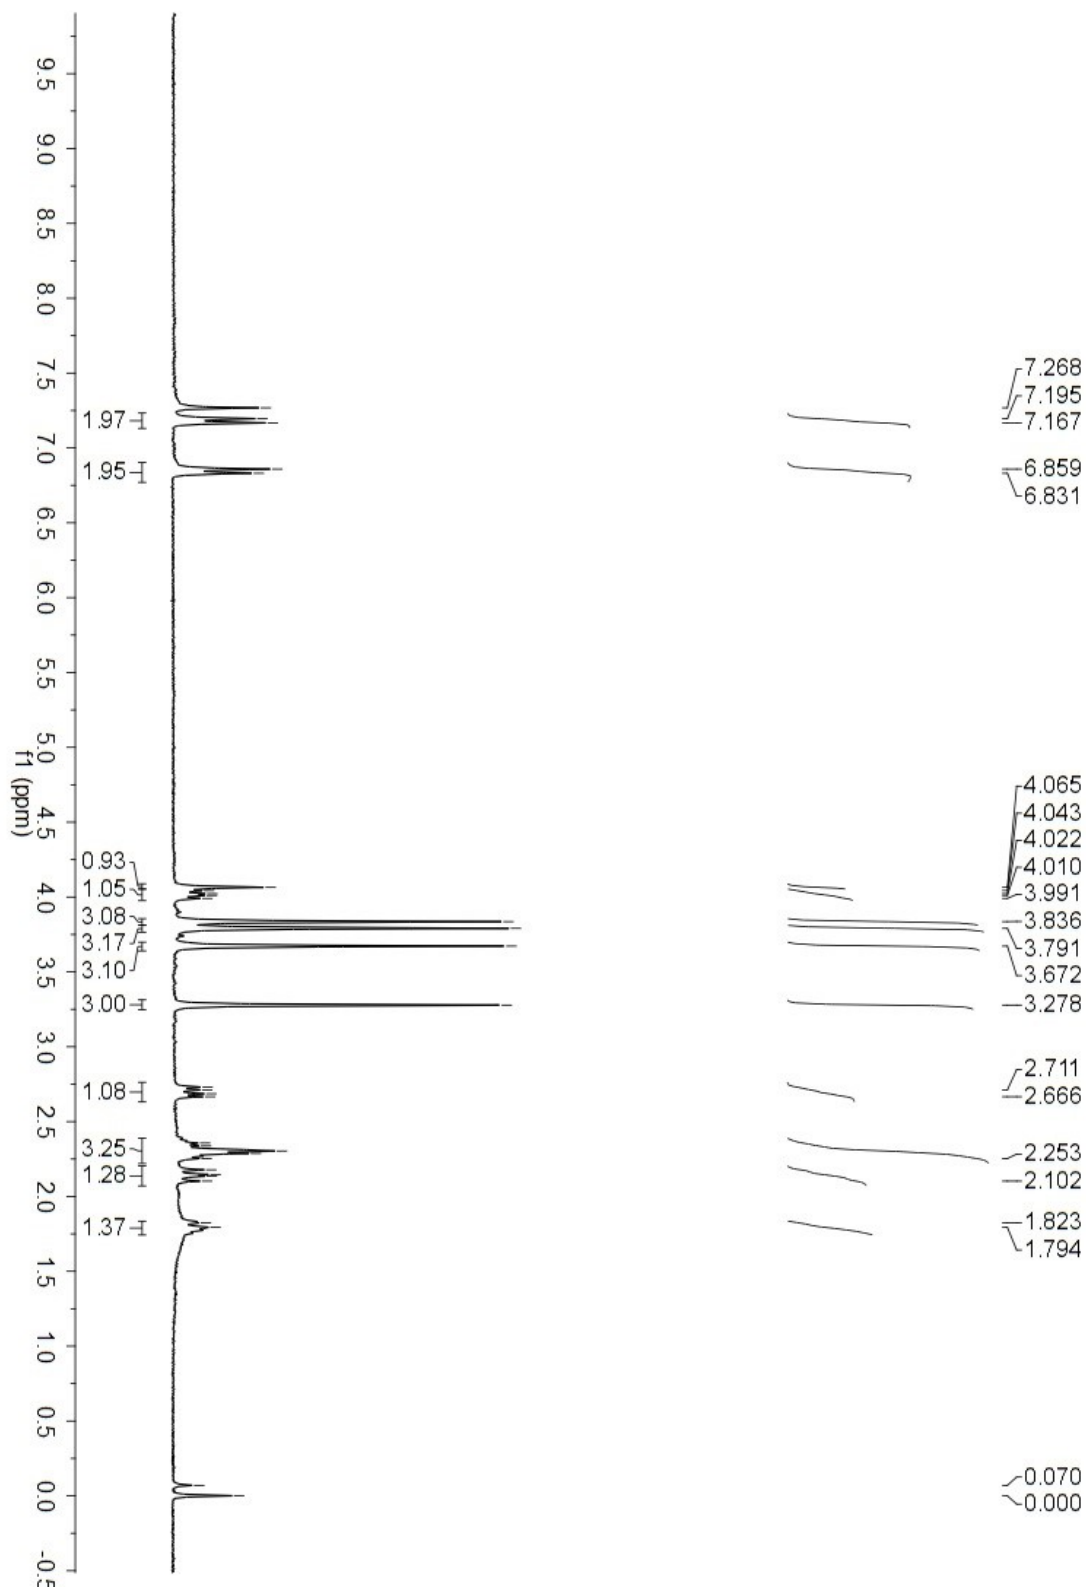

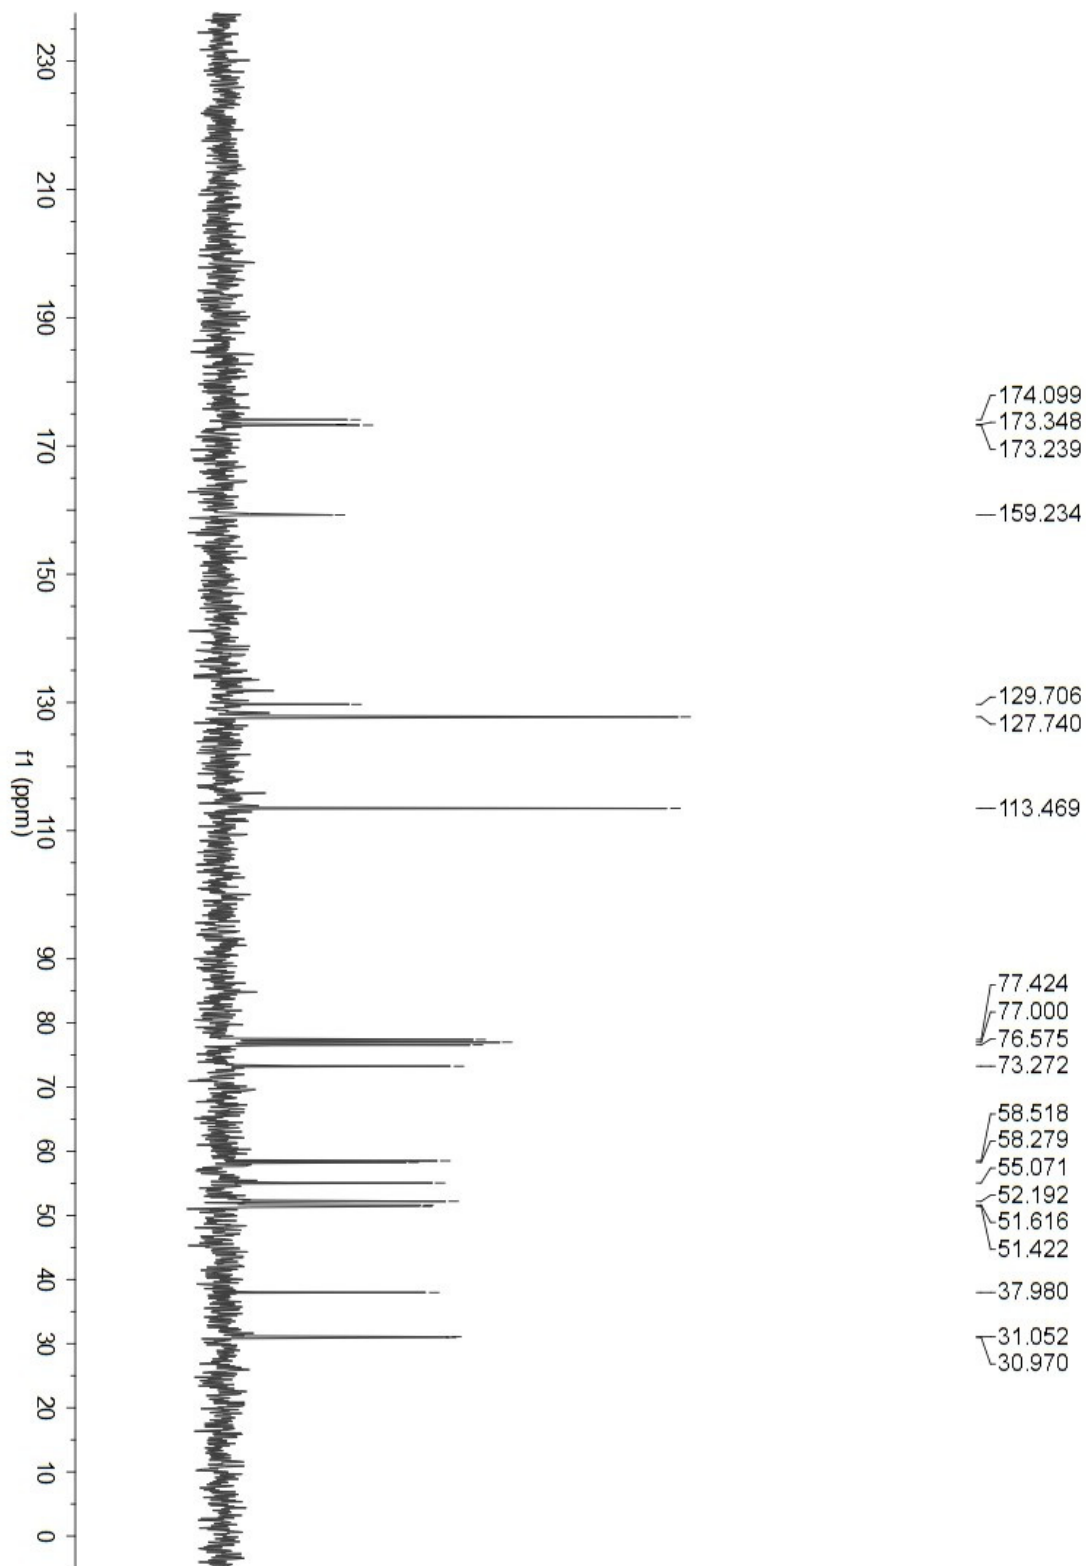

## II. HPLC Chromatograms

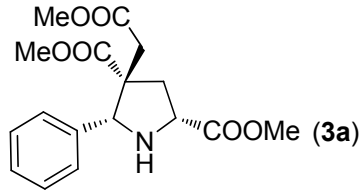

Data File D:\LC\DATA\HZL\YY-1-22\YY-1-22 2013-01-07 19-48-20\026-0101.D  
Sample Name: YY-1-22

```

=====
Acq. Operator   : FX                               Seq. Line :    1
Acq. Instrument : Instrument 1                       Location  : Vial 26
Injection Date  : 1/7/2013 7:49:08 PM              Inj       :    1
                                                    Inj Volume: 5 µl

Acq. Method     : D:\LC\DATA\HZL\YY-1-22\YY-1-22 2013-01-07 19-48-20\IA-30-70-10ML-220NM.M
Last changed    : 1/3/2013 3:41:51 PM by FX
Analysis Method : D:\LC\DATA\HZL\YY-1-22\YY-1-22 2013-01-07 19-48-20\026-0101.D\DA.M (IA-30-
70-10ML-220NM.M)
Last changed    : 1/7/2013 8:33:41 PM by FX
                (modified after loading)
    
```

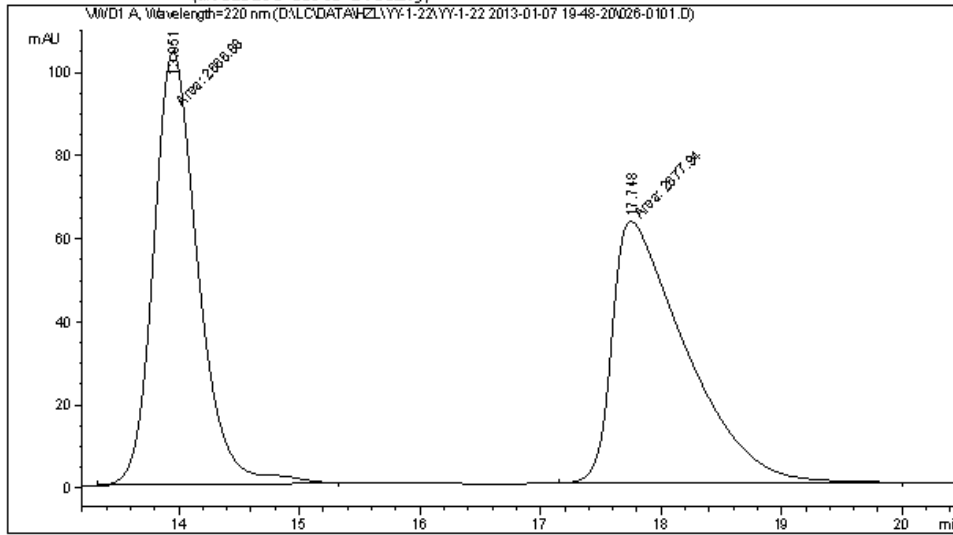

### Area Percent Report

```

=====
Sorted By      : Signal
Multiplier     : 1.0000
Dilution      : 1.0000
Use Multiplier & Dilution Factor with ISTDs
    
```

Signal 1: VWD1 A, Wavelength=220 nm

| Peak # | RetTime [min] | Type | Width [min] | Area mAU   | Area %  | Height [mAU] |
|--------|---------------|------|-------------|------------|---------|--------------|
| 1      | 13.951        | MM   | 0.4265      | 2666.88379 | 49.8966 | 104.22575    |
| 2      | 17.748        | MM   | 0.7086      | 2677.93970 | 50.1034 | 62.98907     |

Totals : 5344.82349 167.21482

\*\*\* End of Report \*\*\*

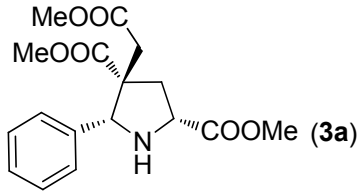

Data File D:\LC\DATA\HZL\YY-1-24\YY-1-24 2013-01-07 20-18-18\027-0101.D  
 Sample Name: YY-1-24

```

=====
Acq. Operator   : FX                               Seq. Line :    1
Acq. Instrument : Instrument 1                     Location  : Vial 27
Injection Date  : 1/7/2013 8:19:15 PM             Inj       :    1
                                                    Inj Volume: 5 µl

Acq. Method     : D:\LC\DATA\HZL\YY-1-24\YY-1-24 2013-01-07 20-18-18\IA-30-70-10ML-220MM.M
Last changed    : 1/3/2013 3:41:51 PM by FX
Analysis Method : D:\LC\DATA\HZL\YY-1-24\YY-1-24 2013-01-07 20-18-18\027-0101.D\DA.M (IA-30-
70-10ML-220MM.M)
Last changed    : 1/7/2013 8:45:52 PM by FX
                 (modified after loading)
  
```

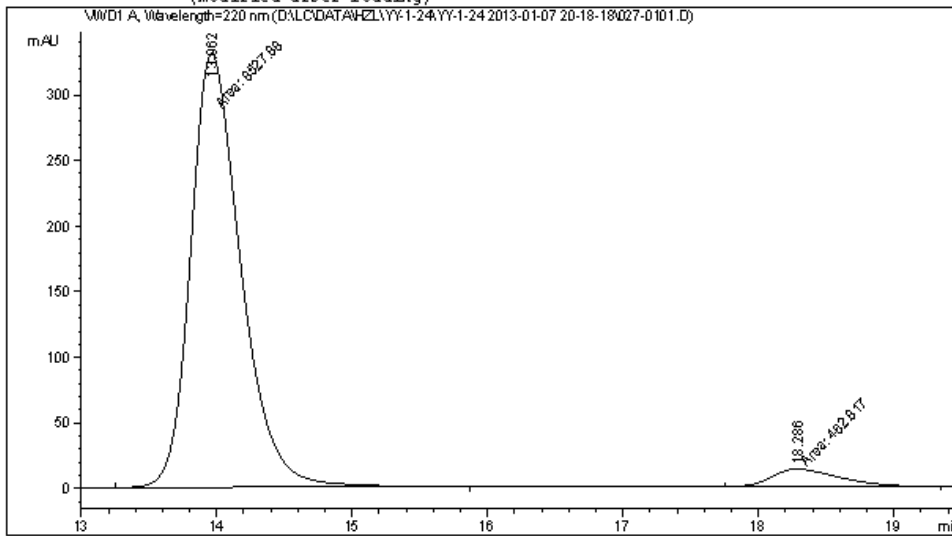

=====  
 Area Percent Report  
 =====

```

Sorted By       :      Signal
Multiplier      :      1.0000
Dilution        :      1.0000
Use Multiplier & Dilution Factor with ISTDs
  
```

Signal 1: VMD1 A, Wavelength=220 nm

| Peak # | RetTime [min] | Type | Width [min] | Area mAU   | Area %  | Height [mAU] |
|--------|---------------|------|-------------|------------|---------|--------------|
| 1      | 13.962        | MM   | 0.4299      | 8527.87695 | 94.8523 | 330.57870    |
| 2      | 18.286        | MM   | 0.5725      | 462.81689  | 5.1477  | 13.47314     |

Totals :                    8990.69385   344.05185

=====  
 \*\*\* End of Report \*\*\*

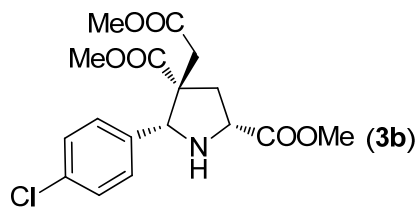

Data File D:\LC\DATA\LQH\LQH-9-80\YY-1-11A 2012-12-05 10-36-17\051-0201.D  
 Sample Name: YY-1-11A

```

=====
Acq. Operator   : FX                               Seq. Line :    2
Acq. Instrument : Instrument 1                       Location  : Vial 51
Injection Date  : 12/5/2012 10:48:41 AM           Inj       :    1
                                                    Inj Volume: 5 µl
Acq. Method     : D:\LC\DATA\LQH\LQH-9-80\YY-1-11A 2012-12-05 10-36-17\ASH-40-60-10ML-220MM.
M
Last changed    : 3/29/2012 7:36:14 PM by HZL
Analysis Method : D:\LC\DATA\LQH\LQH-9-80\YY-1-11A 2012-12-05 10-36-17\051-0201.D\DA.M (ASH-
40-60-10ML-220MM.M)
Last changed    : 12/17/2012 3:24:34 PM by THL
(modified after loading)
  
```

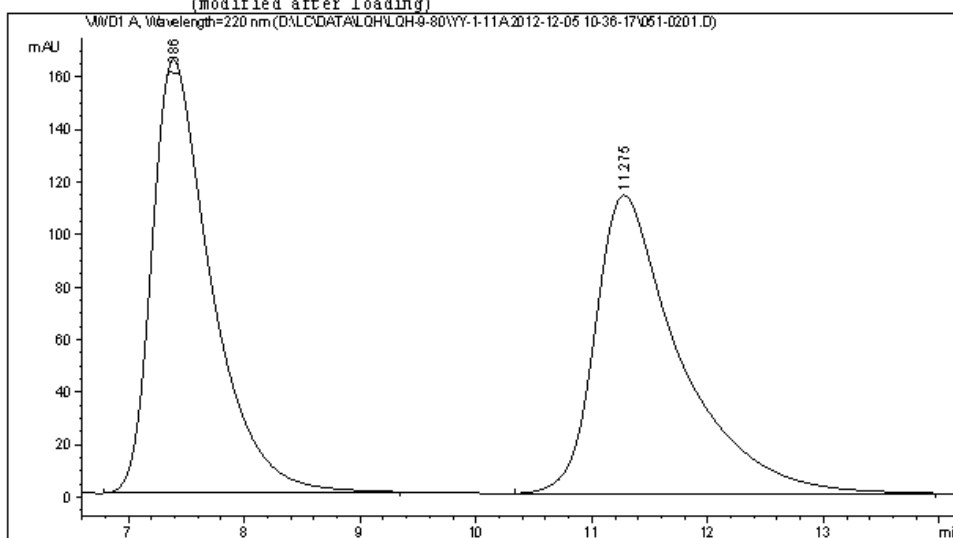

=====  
 Area Percent Report  
 =====

```

Sorted By      :      Signal
Multiplier     :      1.0000
Dilution       :      1.0000
Use Multiplier & Dilution Factor with ISTDs
  
```

Signal 1: VMD1 A, Wavelength=220 nm

| Peak #   | RetTime [min] | Type | Width [min] | Area mAU   | Height [mAU] | Area %  |
|----------|---------------|------|-------------|------------|--------------|---------|
| 1        | 7.386         | BB   | 0.5276      | 5853.91504 | 164.94302    | 50.2682 |
| 2        | 11.275        | BB   | 0.7332      | 5791.45557 | 113.58414    | 49.7318 |
| Totals : |               |      |             | 1.16454e4  | 278.52716    |         |

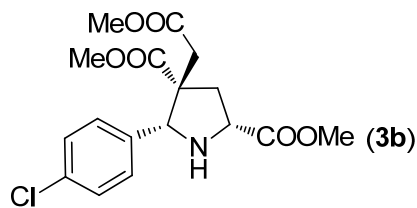

Data File D:\LC\DATA\H2L\YY-1-12\YY-1-12 2012-12-07 09-01-05\053-0201.D  
Sample Name: YY-1-12

```

=====
Acq. Operator   : hzl                      Seq. Line :    2
Acq. Instrument : Instrument 1              Location  : Vial 53
Injection Date  : 12/7/2012 9:13:34 AM     Inj       :    1
                                           Inj Volume: 5 µl
Acq. Method     : D:\LC\DATA\H2L\YY-1-12\YY-1-12 2012-12-07 09-01-05\ASH-40-60-10ML-220NM-
                20MIN.M
Last changed    : 3/26/2012 3:50:21 PM by HZL
Analysis Method : D:\LC\DATA\H2L\YY-1-12\YY-1-12 2012-12-07 09-01-05\053-0201.D\DA.M (ASH-
                40-60-10ML-220NM-20MIN.M)
Last changed    : 1/7/2013 4:01:51 PM by FX
                (modified after loading)
=====

```

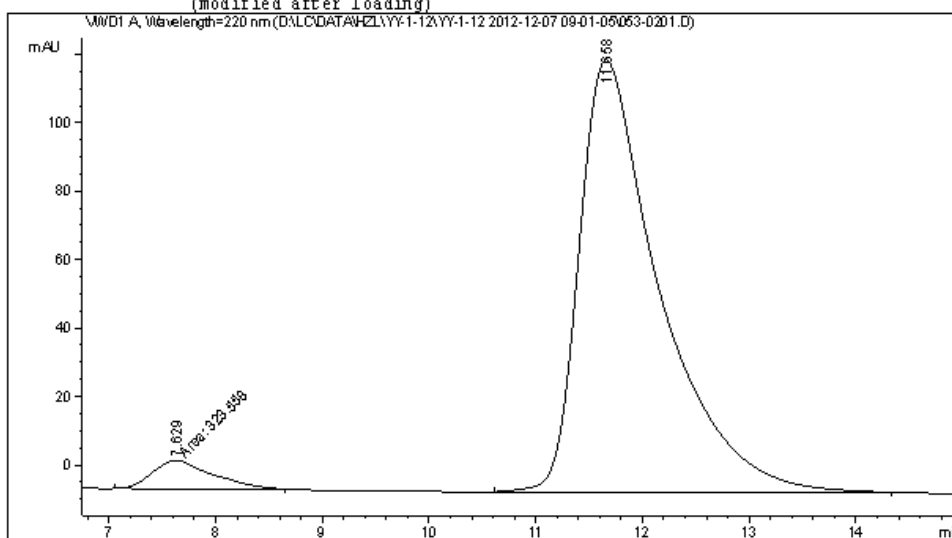

=====  
Area Percent Report  
=====

```

Sorted By      :      Signal
Multiplier     :      1.0000
Dilution       :      1.0000
Use Multiplier & Dilution Factor with ISTDs

```

Signal 1: VMD1 A, Wavelength=220 nm

| Peak #   | RetTime [min] | Type | Width [min] | Area mAU   | Area %  | Height [mAU] |
|----------|---------------|------|-------------|------------|---------|--------------|
| 1        | 7.629         | MM   | 0.6536      | 323.55847  | 4.6752  | 8.25038      |
| 2        | 11.658        | BB   | 0.7591      | 6597.13818 | 95.3248 | 126.35369    |
| Totals : |               |      |             | 6920.69666 |         | 134.60407    |

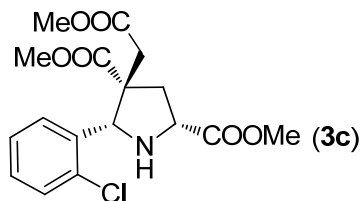

Data File D:\LC\DATA\H2L\YY-1-15\YY-1-15A 2012-12-12 16-38-32\057-0201.D  
Sample Name: YY-1-15A

```

=====
Acq. Operator   : THL                      Seq. Line :    2
Acq. Instrument : Instrument 1              Location  : Vial 57
Injection Date  : 12/12/2012 4:51:18 PM   Inj       :    1
                                           Inj Volume: 5 µl
Acq. Method     : D:\LC\DATA\H2L\YY-1-15\YY-1-15A 2012-12-12 16-38-32\ASH-40-60-10ML-220NM.M
Last changed    : 3/29/2012 7:36:14 PM by HZL
Analysis Method : D:\LC\DATA\H2L\YY-1-15\YY-1-15A 2012-12-12 16-38-32\057-0201.D\DA.M (ASH-
40-60-10ML-220NM.M)
Last changed    : 1/7/2013 3:56:50 PM by FX
                 (modified after loading)
=====

```

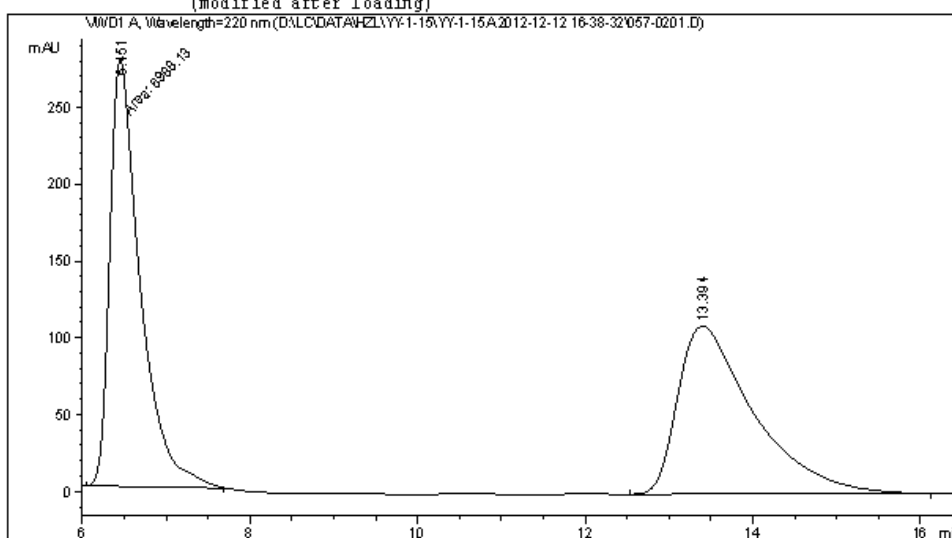

=====  
Area Percent Report  
=====

```

Sorted By      :      Signal
Multiplier     :      1.0000
Dilution       :      1.0000
Use Multiplier & Dilution Factor with ISTDs

```

Signal 1: VMD1 A, Wavelength=220 nm

| Peak # | RetTime [min] | Type | Width [min] | Area mAU   | Area %  | Height [mAU] |
|--------|---------------|------|-------------|------------|---------|--------------|
| 1      | 6.451         | MM   | 0.4202      | 6988.13379 | 50.4390 | 277.18835    |
| 2      | 13.394        | BB   | 0.9194      | 6866.49561 | 49.5610 | 109.28332    |

Totals :                    1.38546e4    386.47167

=====  
\*\*\* End of Report \*\*\*



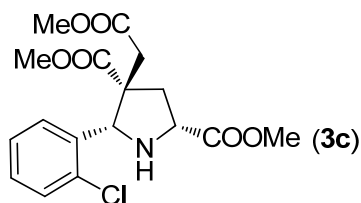

Data File D:\LC\DATA\H2L\YY-1-16\YY-1-16 2012-12-17 15-20-24\001-0201.D  
Sample Name: YY-1-16A

```

=====
Acq. Operator   : FX                               Seq. Line :    2
Acq. Instrument : Instrument 1                     Location  : Vial 1
Injection Date  : 12/17/2012 3:32:49 PM          Inj       :    1
                                                    Inj Volume: 5 µl
Acq. Method     : D:\LC\DATA\H2L\YY-1-16\YY-1-16 2012-12-17 15-20-24\ASH-40-60-10ML-220NM-
                20MIN.M
Last changed    : 3/26/2012 3:50:21 PM by HZL
Analysis Method : D:\LC\DATA\H2L\YY-1-16\YY-1-16 2012-12-17 15-20-24\001-0201.D\DA.M (ASH-
                40-60-10ML-220NM-20MIN.M)
Last changed    : 1/7/2013 4:04:01 PM by FX
                (modified after loading)
=====

```

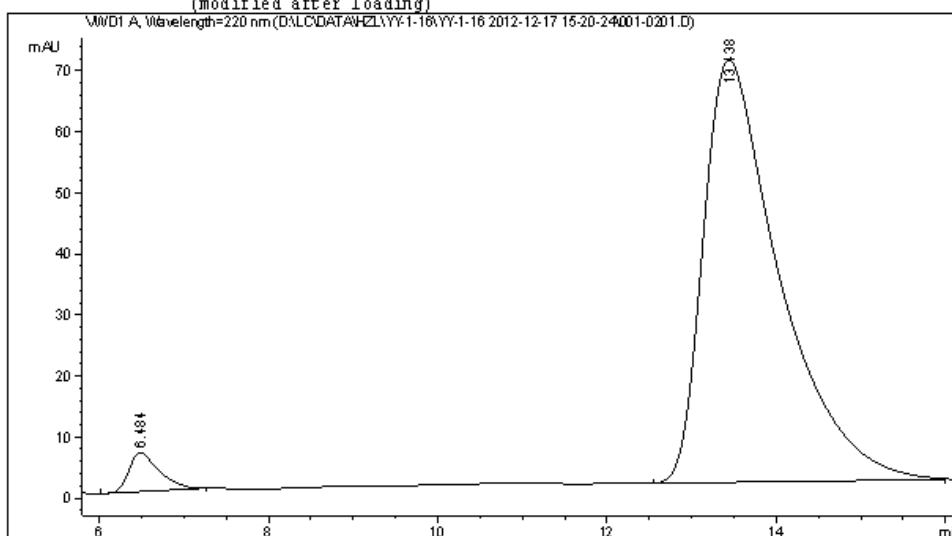

=====  
Area Percent Report  
=====

```

Sorted By      :      Signal
Multiplier     :      1.0000
Dilution       :      1.0000
Use Multiplier & Dilution Factor with ISTDs

```

Signal 1: VMD1 A, Wavelength=220 nm

| Peak # | RetTime [min] | Type | Width [min] | Area mAU *s | Height [mAU] | Area %  |
|--------|---------------|------|-------------|-------------|--------------|---------|
| 1      | 6.484         | VB   | 0.3684      | 158.73198   | 6.42220      | 3.5352  |
| 2      | 13.438        | BB   | 0.9177      | 4331.29297  | 69.22897     | 96.4648 |

Totals :                    4490.02495    75.65118

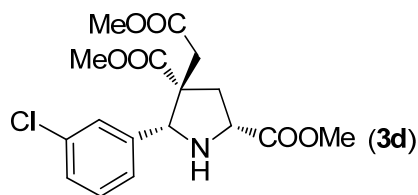

Data File D:\LC\DATA\HZL\YY-1-15\YY-1-15B 2013-01-03 15-53-21\063-0101.D  
 Sample Name: YY-1-15B

```

=====
Acq. Operator   : FX                               Seq. Line :    1
Acq. Instrument : Instrument 1                       Location  : Vial 63
Injection Date  : 1/3/2013 3:54:13 PM              Inj       :    1
                                                    Inj Volume: 5 µl
Acq. Method     : D:\LC\DATA\HZL\YY-1-15\YY-1-15B 2013-01-03 15-53-21\IA-30-70-10ML-220NM.M
Last changed    : 1/3/2013 3:41:51 PM by FX
Analysis Method : D:\LC\DATA\HZL\YY-1-15\YY-1-15B 2013-01-03 15-53-21\063-0101.D\DA.M (IA-
30-70-10ML-220NM.M)
Last changed    : 1/7/2013 3:59:29 PM by FX
(modified after loading)
  
```

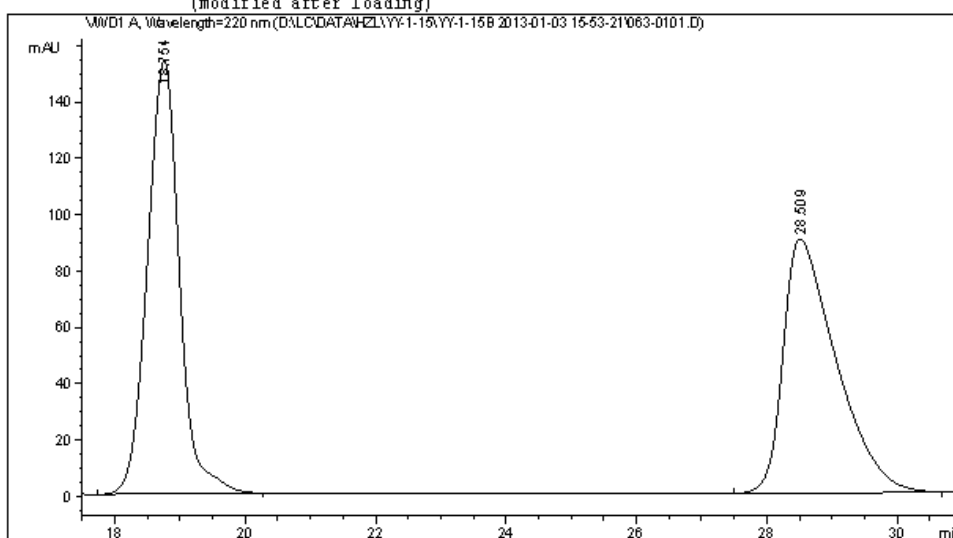

=====  
 Area Percent Report  
 =====

```

Sorted By      :      Signal
Multiplier     :      1.0000
Dilution       :      1.0000
Use Multiplier & Dilution Factor with ISTDs
  
```

Signal 1: VMD1 A, Wavelength=220 nm

| Peak # | RetTime [min] | Type | Width [min] | Area mAU   | Area %  | Height [mAU] |
|--------|---------------|------|-------------|------------|---------|--------------|
| 1      | 18.754        | VB   | 0.5251      | 5257.20654 | 50.7251 | 153.93182    |
| 2      | 28.509        | BB   | 0.8424      | 5106.90527 | 49.2749 | 90.21821     |

Totals :                    1.03641e4    244.15003

=====  
 \*\*\* End of Report \*\*\*



Data File D:\LC\DATA\HZL\YY-1-16\YY-1-16B 2013-01-03 16-39-09\064-0101.D  
 Sample Name: YY-1-16B

```

=====
Acq. Operator   : FX                      Seq. Line :    1
Acq. Instrument : Instrument 1             Location  : Vial 64
Injection Date  : 1/3/2013 4:39:51 PM    Inj       :    1
                                           Inj Volume: 5 µl
Acq. Method     : D:\LC\DATA\HZL\YY-1-16\YY-1-16B 2013-01-03 16-39-09\IA-30-70-10ML-220NM-
                                           35MIN.M
Last changed    : 1/3/2013 4:34:59 PM by FX
Analysis Method : D:\LC\DATA\HZL\YY-1-16\YY-1-16B 2013-01-03 16-39-09\064-0101.D\DA.M (IA-
                                           30-70-10ML-220NM-35MIN.M)
Last changed    : 1/7/2013 4:06:33 PM by FX
                                           (modified after loading)
=====
  
```

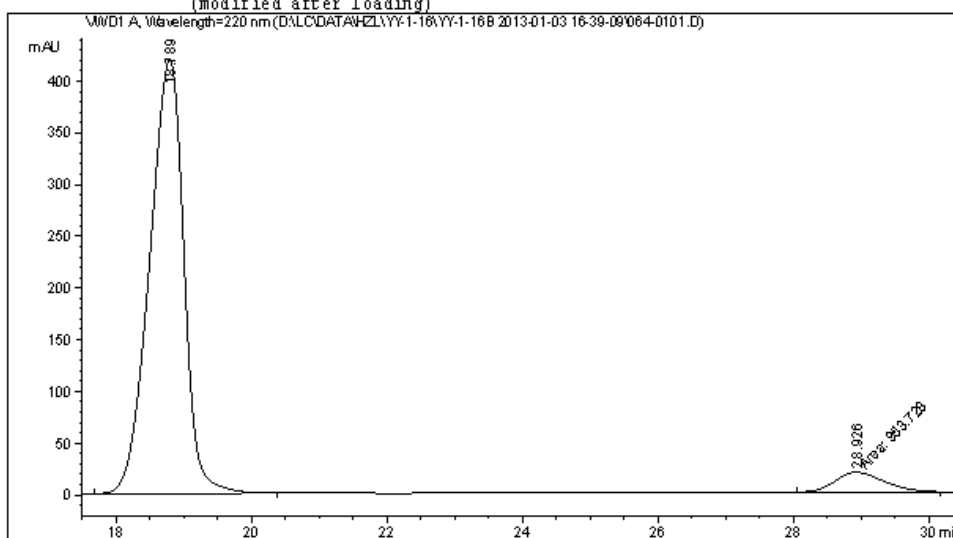

=====  
 Area Percent Report  
 =====

```

Sorted By      :      Signal
Multiplier     :      1.0000
Dilution      :      1.0000
Use Multiplier & Dilution Factor with ISTDs
  
```

Signal 1: VMD1 A, Wavelength=220 nm

| Peak #   | RetTime [min] | Type | Width [min] | Area mAU *s | Height [mAU] | Area %  |
|----------|---------------|------|-------------|-------------|--------------|---------|
| 1        | 18.789        | BB   | 0.5462      | 1.47052e4   | 419.15494    | 93.9094 |
| 2        | 28.926        | MM   | 0.8312      | 953.72791   | 19.12265     | 6.0906  |
| Totals : |               |      |             | 1.56590e4   | 438.27759    |         |

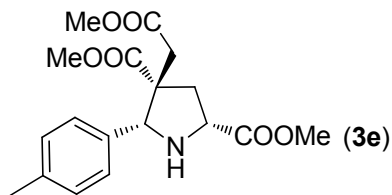

Data File D:\LC\DATA\H2L\YY-1-17\YY-1-17A-ADH 2012-12-29 16-52-59\033-0101.D  
 Sample Name: YY-1-17A

```

=====
Acq. Operator   : FX                               Seq. Line :    1
Acq. Instrument : Instrument 1                     Location  : Vial 33
Injection Date  : 12/29/2012 4:54:17 PM           Inj       :    1
                                                    Inj Volume: 5 µl
Acq. Method     : D:\LC\DATA\H2L\YY-1-17\YY-1-17A-ADH 2012-12-29 16-52-59\ADH-30-70-1ML-
                  220NM.M
Last changed    : 12/29/2012 4:43:24 PM by FX
Analysis Method : D:\LC\DATA\H2L\YY-1-17\YY-1-17A-ADH 2012-12-29 16-52-59\033-0101.D\DA.M (
                  ADH-30-70-1ML-220NM.M)
Last changed    : 1/7/2013 4:08:02 PM by FX
                  (modified after loading)
=====
  
```

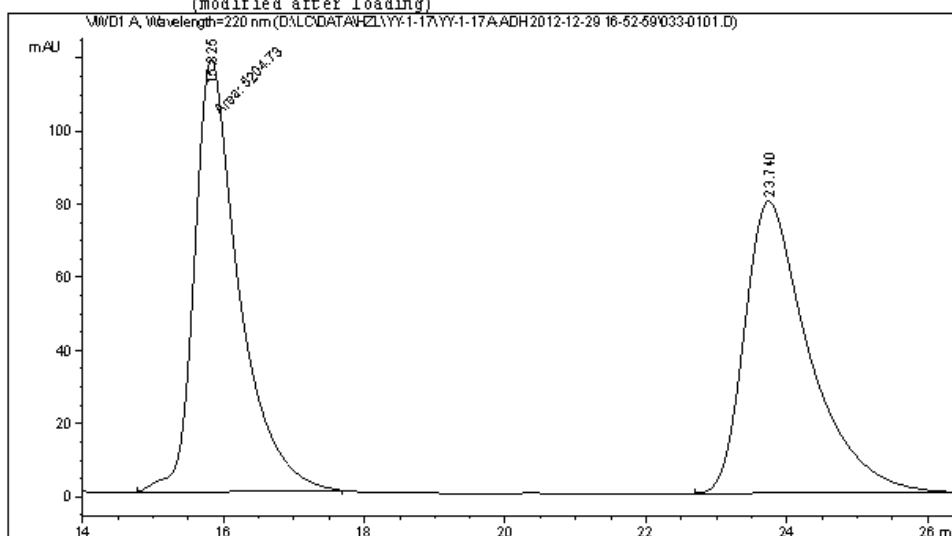

Area Percent Report

```

Sorted By      : Signal
Multiplier     : 1.0000
Dilution       : 1.0000
Use Multiplier & Dilution Factor with ISTDs
  
```

Signal 1: WVD1 A, Wavelength=220 nm

| Peak # | RetTime [min] | Type | Width [min] | Area mAU *s | Height [mAU] | Area %  |
|--------|---------------|------|-------------|-------------|--------------|---------|
| 1      | 15.825        | MM   | 0.7341      | 5204.73437  | 118.17170    | 50.5686 |
| 2      | 23.740        | BB   | 0.9426      | 5087.69531  | 79.87216     | 49.4314 |

Totals : 1.02924e4 198.04386



Data File D:\LC\DATA\H2L\YY-1-18\YY-1-18A 2013-01-03 19-21-24\065-0101.D  
 Sample Name: YY-1-18A

```

=====
Acq. Operator   : FX                               Seq. Line :    1
Acq. Instrument : Instrument 1                       Location  : Vial 65
Injection Date  : 1/3/2013 7:22:54 PM              Inj       :    1
                                                    Inj Volume: 5 µl
Acq. Method     : D:\LC\DATA\H2L\YY-1-18\YY-1-18A 2013-01-03 19-21-24\ADH-30-70-1ML-220NM.M
Last changed    : 12/29/2012 4:43:24 PM by FX
Analysis Method : D:\LC\DATA\H2L\YY-1-18\YY-1-18A 2013-01-03 19-21-24\065-0101.D\DA.M (ADH-
30-70-1ML-220NM.M)
Last changed    : 1/7/2013 4:17:57 PM by FX
                  (modified after loading)
  
```

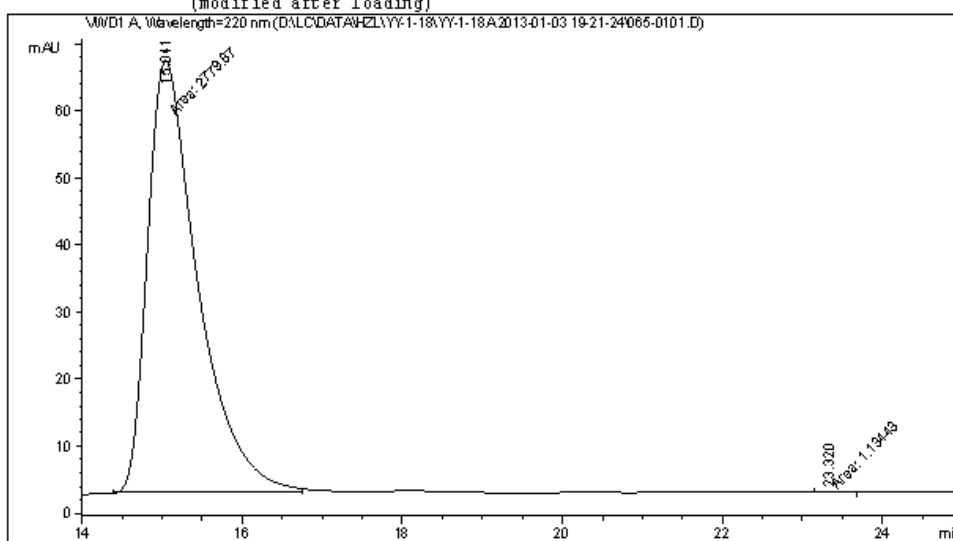

=====  
 Area Percent Report  
 =====

```

Sorted By      :      Signal
Multiplier     :      1.0000
Dilution       :      1.0000
Use Multiplier & Dilution Factor with ISTDs
  
```

Signal 1: VMD1 A, Wavelength=220 nm

| Peak # | RetTime [min] | Type | Width [min] | Area mAU   | Area %  | Height [mAU] |
|--------|---------------|------|-------------|------------|---------|--------------|
| 1      | 15.041        | MM   | 0.7217      | 2779.86816 | 99.9592 | 64.19346     |
| 2      | 23.320        | MM   | 0.3311      | 1.13443    | 0.0408  | 5.71045e-2   |

Totals :                                    2781.00259    64.25056

=====  
 \*\*\* End of Report \*\*\*

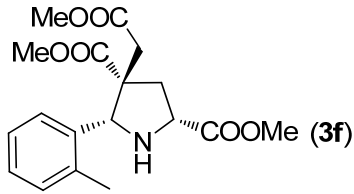

Data File D:\LC\DATA\H2L\YY-1-17\YY-1-17B-ADH 2013-01-03 20-00-57\066-0101.D  
 Sample Name: YY-1-17B

```

=====
Acq. Operator   : FX                      Seq. Line :    1
Acq. Instrument : Instrument 1             Location  : Vial 66
Injection Date  : 1/3/2013 8:02:34 PM    Inj       :    1
                                           Inj Volume: 5 µl
Acq. Method     : D:\LC\DATA\H2L\YY-1-17\YY-1-17B-ADH 2013-01-03 20-00-57\ADH-30-70-1ML-
                220NM.M
Last changed    : 12/29/2012 4:43:24 PM by FX
Analysis Method : D:\LC\DATA\H2L\YY-1-17\YY-1-17B-ADH 2013-01-03 20-00-57\066-0101.D\DA.M (
                ADH-30-70-1ML-220NM.M)
Last changed    : 1/7/2013 4:11:31 PM by FX
                (modified after loading)
=====
  
```

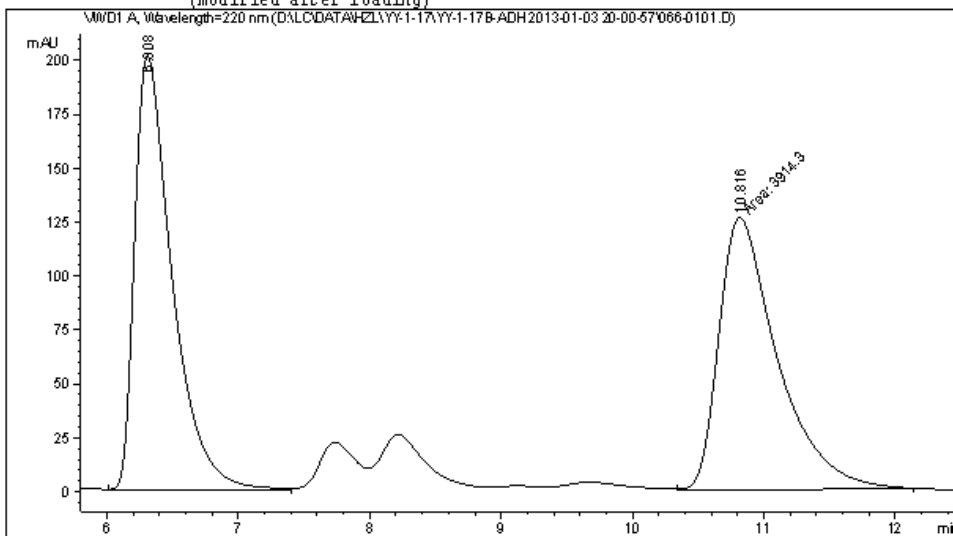

Area Percent Report

```

Sorted By      : Signal
Multiplier     : 1.0000
Dilution       : 1.0000
Use Multiplier & Dilution Factor with ISTDs
  
```

Signal 1: WVD1 A, Wavelength=220 nm

| Peak # | RetTime [min] | Type | Width [min] | Area mAU   | Height [mAU] | Area %  |
|--------|---------------|------|-------------|------------|--------------|---------|
| 1      | 6.308         | VB   | 0.2982      | 4023.38062 | 201.76347    | 50.6871 |
| 2      | 10.816        | MM   | 0.5163      | 3914.29907 | 126.36263    | 49.3129 |

Totals : 7937.67969 328.12611

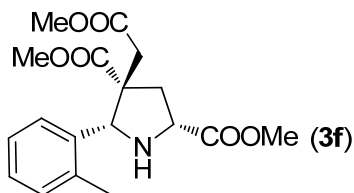

Data File D:\LC\DATA\H2L\YY-1-18\YY-1-18B-ADH 2013-01-03 20-30-15\067-0101.D  
Sample Name: YY-1-18B

```

=====
Acq. Operator   : FX                               Seq. Line :    1
Acq. Instrument : Instrument 1                       Location  : Vial 67
Injection Date  : 1/3/2013 8:32:01 PM              Inj       :    1
                                                    Inj Volume: 5 µl
Acq. Method     : D:\LC\DATA\H2L\YY-1-18\YY-1-18B-ADH 2013-01-03 20-30-15\ADH-30-70-1ML-
                220NM.M
Last changed    : 12/29/2012 4:43:24 PM by FX
Analysis Method : D:\LC\DATA\H2L\YY-1-18\YY-1-18B-ADH 2013-01-03 20-30-15\067-0101.D\DA.M (
                ADH-30-70-1ML-220NM.M)
Last changed    : 1/7/2013 4:20:06 PM by FX
                (modified after loading)
=====

```

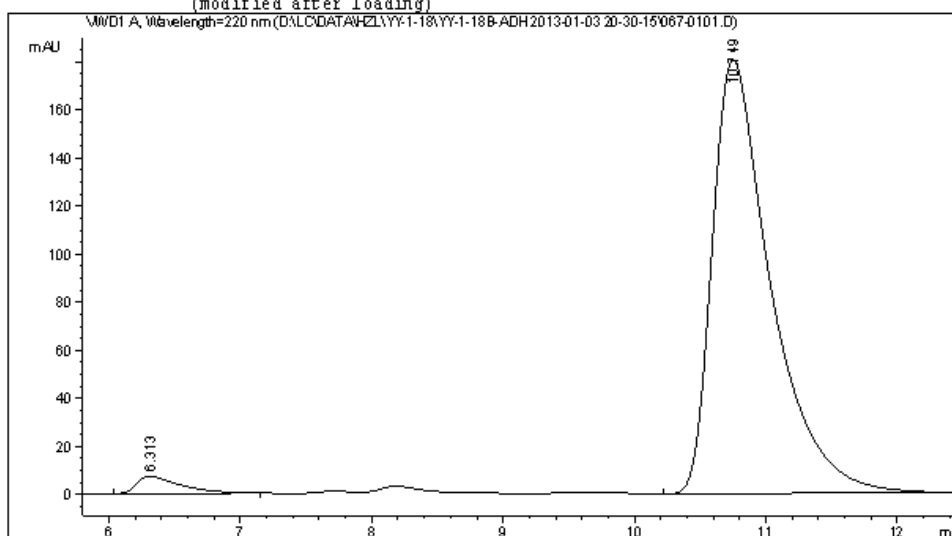

Area Percent Report

```

=====
Sorted By      :      Signal
Multiplier     :      1.0000
Dilution      :      1.0000
Use Multiplier & Dilution Factor with ISTDs
=====

```

Signal 1: WVD1 A, Wavelength=220 nm

| Peak # | RetTime [min] | Type | Width [min] | Area mAU   | Area *s   | Height [mAU] | Area % |
|--------|---------------|------|-------------|------------|-----------|--------------|--------|
| 1      | 6.313         | BB   | 0.3341      | 166.21271  | 7.22071   | 2.8968       |        |
| 2      | 10.749        | VB   | 0.4577      | 5571.59863 | 180.51045 | 97.1032      |        |

Totals :                    5737.81134   187.73116

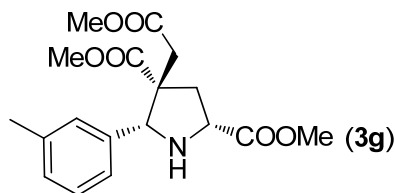

Data File D:\LC\DATA\H2L\YY-1-17\YY-1-17C-ADH 2013-01-07 09-04-39\021-0101.D  
Sample Name: YY-1-17C

```

=====
Acq. Operator   : FX                               Seq. Line :    1
Acq. Instrument : Instrument 1                       Location  : Vial 21
Injection Date  : 1/7/2013 9:06:02 AM              Inj       :    1
                                                    Inj Volume: 5 µl
Acq. Method     : D:\LC\DATA\H2L\YY-1-17\YY-1-17C-ADH 2013-01-07 09-04-39\ADH-30-70-1ML-
                220NM.M
Last changed    : 12/29/2012 4:43:24 PM by FX
Analysis Method : D:\LC\DATA\H2L\YY-1-17\YY-1-17C-ADH 2013-01-07 09-04-39\021-0101.D\DA.M (
                ADH-30-70-1ML-220NM.M)
Last changed    : 1/7/2013 4:14:44 PM by FX
                (modified after loading)
=====

```

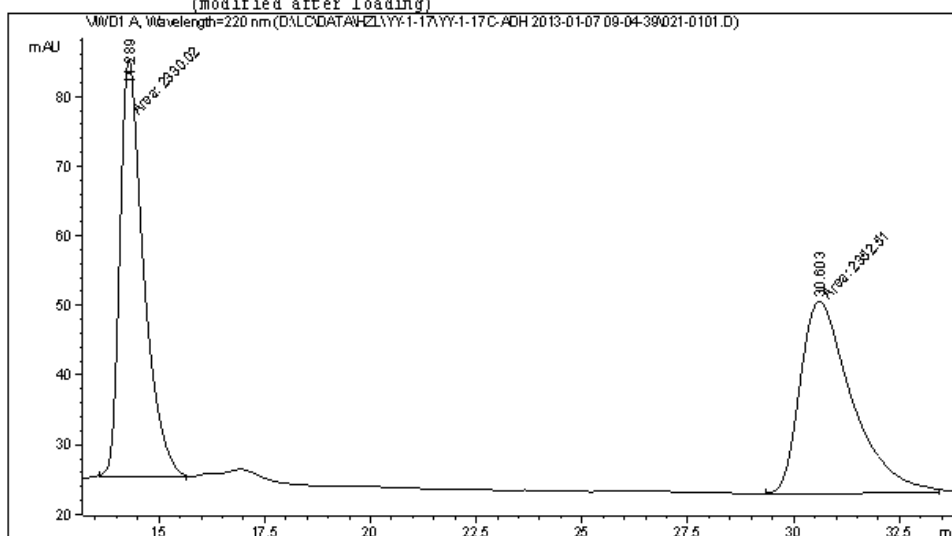

Area Percent Report

```

=====
Sorted By      :      Signal
Multiplier     :      1.0000
Dilution       :      1.0000
Use Multiplier & Dilution Factor with ISTDs
=====

```

Signal 1: WVD1 A, Wavelength=220 nm

| Peak # | RetTime [min] | Type | Width [min] | Area mAU *s | Height [mAU] | Area %  |
|--------|---------------|------|-------------|-------------|--------------|---------|
| 1      | 14.289        | MM   | 0.6491      | 2330.02441  | 59.82674     | 49.7599 |
| 2      | 30.603        | MM   | 1.4200      | 2352.51440  | 27.61145     | 50.2401 |

Totals :                    4682.53882    87.43820

Instrument 1 1/7/2013 4:14:51 PM FX

Page 1 of 1



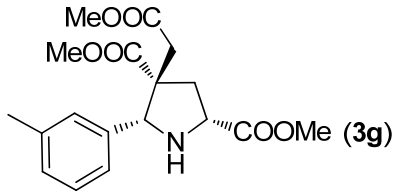

Data File D:\LC\DATA\H2L\YY-1-18\YY-1-18C-ADH 2013-01-07 20-48-54\028-0101.D  
 Sample Name: YY-1-18C

```

=====
Acq. Operator   : FX                               Seq. Line :    1
Acq. Instrument : Instrument 1                       Location  : Vial 28
Injection Date  : 1/ 7/2013 8:50:11 PM             Inj       :    1
                                                    Inj Volume: 5 µl
Acq. Method     : D:\LC\DATA\H2L\YY-1-18\YY-1-18C-ADH 2013-01-07 20-48-54\ADH-30-70-1ML-
                  220NM.M
Last changed    : 12/29/2012 4:43:24 PM by FX
Analysis Method : D:\LC\DATA\H2L\YY-1-18\YY-1-18C-ADH 2013-01-07 20-48-54\028-0101.D\DA.M (
                  ADH-30-70-1ML-220NM.M)
Last changed    : 5/ 8/2013 7:44:27 PM by TL
                  (modified after loading)
=====
  
```

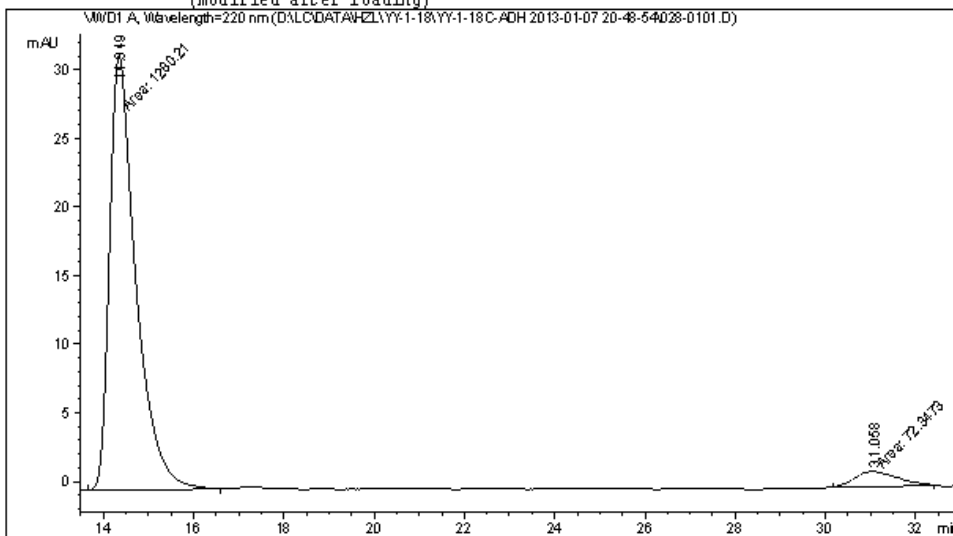

Area Percent Report

```

Sorted By      :      Signal
Multiplier     :      1.0000
Dilution       :      1.0000
Use Multiplier & Dilution Factor with ISTDs
  
```

Signal 1: VWD1 A, Wavelength=220 nm

| Peak #   | RetTime [min] | Type | Width [min] | Area mAU *s | Height [mAU] | Area %  |
|----------|---------------|------|-------------|-------------|--------------|---------|
| 1        | 14.349        | MM   | 0.6748      | 1280.20642  | 31.61749     | 94.6511 |
| 2        | 31.058        | MM   | 1.1017      | 72.34727    | 1.09451      | 5.3489  |
| Totals : |               |      |             | 1352.55370  | 32.71200     |         |

Instrument 1 5/8/2013 7:44:37 PM TL

Page 1 of 1

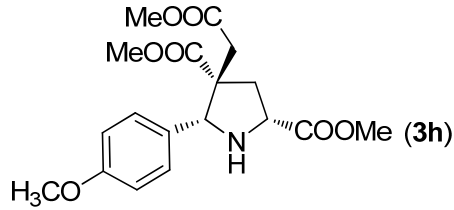

Data File D:\LC\DATA\H2L\YY-1-20\YY-1-20 2012-12-21 16-46-07\053-0101.D  
 Sample Name: YY-1-20A

```

=====
Acq. Operator   : TMC                      Seq. Line :    1
Acq. Instrument : Instrument 1              Location  : Vial 53
Injection Date  : 12/21/2012 4:47:36 PM   Inj       :    1
                                           Inj Volume: 5 µl

Acq. Method     : D:\LC\DATA\H2L\YY-1-20\YY-1-20 2012-12-21 16-46-07\ASH-40-60-10ML-220NM.M
Last changed    : 3/29/2012 7:36:14 PM by HZL
Analysis Method : D:\LC\DATA\H2L\YY-1-20\YY-1-20 2012-12-21 16-46-07\053-0101.D\DA.M (ASH-
40-60-10ML-220NM.M)
Last changed    : 1/7/2013 4:22:26 PM by FX
                 (modified after loading)
  
```

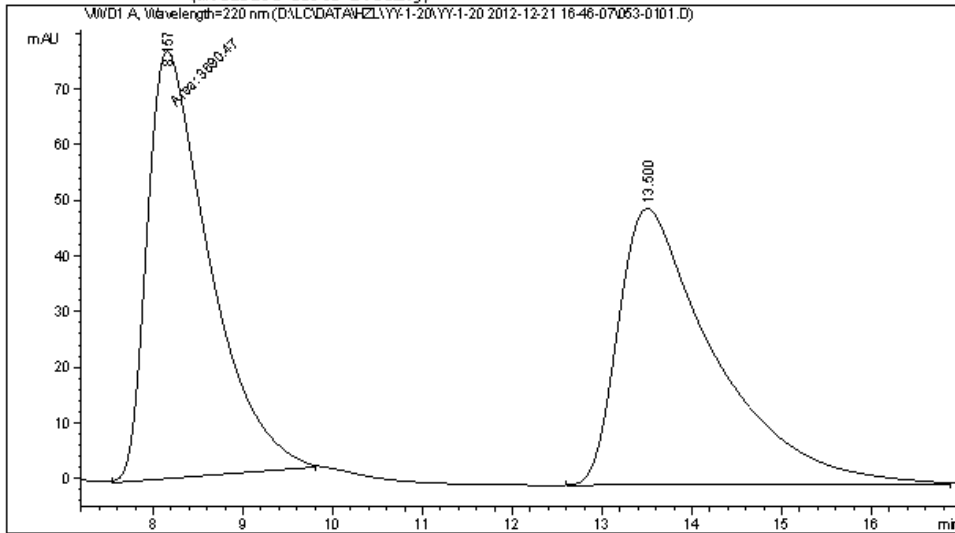

Area Percent Report

```

Sorted By      : Signal
Multiplier     : 1.0000
Dilution       : 1.0000
Use Multiplier & Dilution Factor with ISTDs
  
```

Signal 1: VWD1 A, Wavelength=220 nm

| Peak # | RetTime [min] | Type | Width [min] | Area mAU   | Height [mAU] | Area %  |
|--------|---------------|------|-------------|------------|--------------|---------|
| 1      | 8.157         | MM   | 0.8008      | 3690.47437 | 76.80820     | 49.9183 |
| 2      | 13.500        | BE   | 1.0601      | 3702.55688 | 49.68518     | 50.0817 |

Totals : 7393.03125 126.49338

\*\*\* End of Report \*\*\*



Data File D:\LC\DATA\HZZ\YY-1-15A\YY-1-15A-4 2013-05-22 10-21-28\002-0201.D  
 Sample Name: YY-1-53

```

=====
Acq. Operator   : TL                               Seq. Line :    2
Acq. Instrument : Instrument 1                     Location  : Vial 2
Injection Date  : 5/22/2013 10:41:21 AM          Inj       :    1
                                                    Inj Volume: 5 µl

Acq. Method     : D:\LC\DATA\HZZ\YY-1-15A\YY-1-15A-4 2013-05-22 10-21-28\ASH-40-60-10ML-
                220NM-20MIN.M
Last changed    : 3/26/2012 3:50:21 PM by HZL
Analysis Method : D:\LC\DATA\HZZ\YY-1-15A\YY-1-15A-4 2013-05-22 10-21-28\002-0201.D\DA.M (
                ASH-40-60-10ML-220NM-20MIN.M)
Last changed    : 5/23/2013 11:07:03 AM by TL
                (modified after loading)
=====
  
```

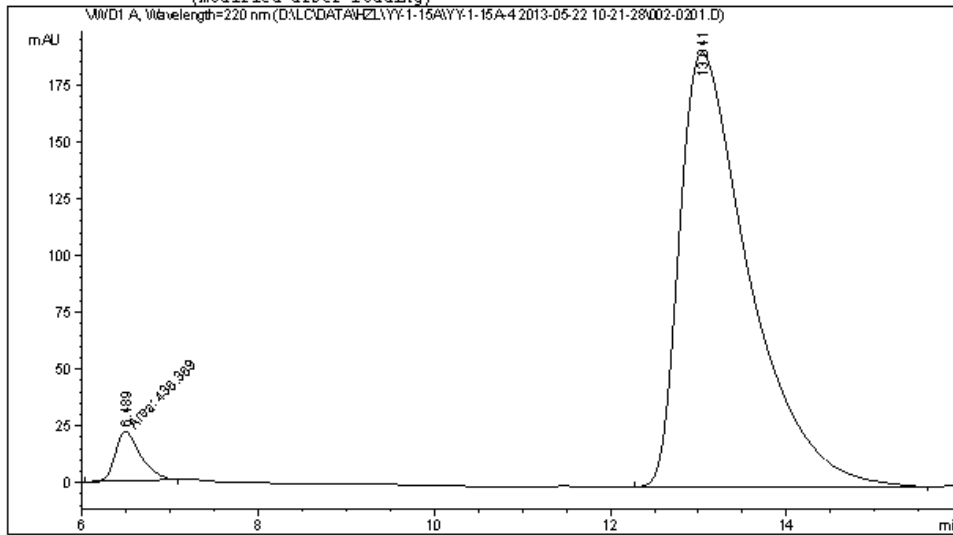

=====  
 Area Percent Report  
 =====

```

Sorted By      :      Signal
Multiplier     :      1.0000
Dilution       :      1.0000
Use Multiplier & Dilution Factor with ISTDs
  
```

Signal 1: VMD1 A, Wavelength=220 nm

| Peak # | RetTime [min] | Type | Width [min] | Area mAU  | Area %  | Height [mAU] |
|--------|---------------|------|-------------|-----------|---------|--------------|
| 1      | 6.489         | MM   | 0.3338      | 436.36874 | 3.9914  | 21.78748     |
| 2      | 13.041        | BB   | 0.8202      | 1.04964e4 | 96.0086 | 191.00128    |

Totals :                    1.09328e4    212.78876

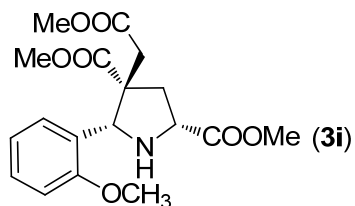

Data File D:\LC\DATA\H2L\YY-1-20\YY-1-20B-ADH 2013-01-07 09-51-17\022-0101.D  
 Sample Name: YY-1-20B

```

=====
Acq. Operator   : FX                      Seq. Line :    1
Acq. Instrument : Instrument 1             Location  : Vial 22
Injection Date  : 1/7/2013 9:53:00 AM     Inj       :    1
                                           Inj Volume: 5 µl
Acq. Method     : D:\LC\DATA\H2L\YY-1-20\YY-1-20B-ADH 2013-01-07 09-51-17\ADH-30-70-1ML-
                  220NM.M
Last changed    : 12/29/2012 4:43:24 PM by FX
Analysis Method : D:\LC\DATA\H2L\YY-1-20\YY-1-20B-ADH 2013-01-07 09-51-17\022-0101.D\DA.M (
                  ADH-30-70-1ML-220NM.M)
Last changed    : 1/7/2013 4:25:05 PM by FX
                  (modified after loading)
=====
  
```

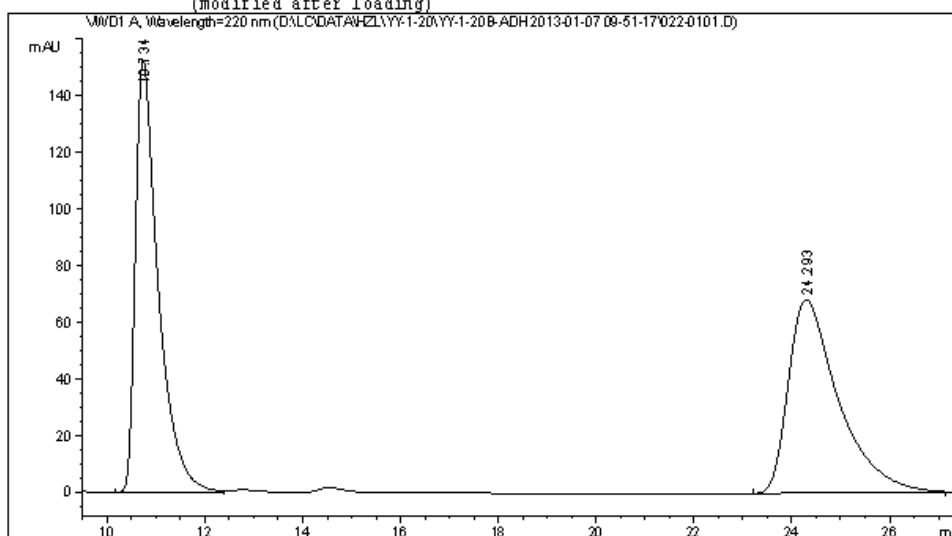

Area Percent Report

```

Sorted By      : Signal
Multiplier     : 1.0000
Dilution       : 1.0000
Use Multiplier & Dilution Factor with ISTDs
  
```

Signal 1: WVD1 A, Wavelength=220 nm

| Peak # | RetTime [min] | Type | Width [min] | Area mAU   | Area %  | Height [mAU] |
|--------|---------------|------|-------------|------------|---------|--------------|
| 1      | 10.734        | BB   | 0.4791      | 4963.49072 | 50.5202 | 152.92928    |
| 2      | 24.293        | BB   | 1.0392      | 4861.26416 | 49.4798 | 68.49332     |

Totals : 9824.75488 221.42259

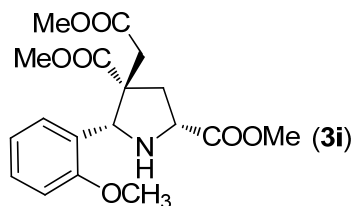

Data File D:\LC\DATA\H2L\YY-1-21\YY-1-21B 2013-01-07 10-23-09\023-0101.D  
Sample Name: YY-1-21B

```
=====
Acq. Operator   : FX                               Seq. Line :    1
Acq. Instrument : Instrument 1                     Location  : Vial 23
Injection Date  : 1/7/2013 10:25:03 AM             Inj       :    1
                                                    Inj Volume: 5 µl

Acq. Method     : D:\LC\DATA\H2L\YY-1-21\YY-1-21B 2013-01-07 10-23-09\ADH-30-70-1ML-220NM.M
Last changed    : 12/29/2012 4:43:24 PM by FX
Analysis Method : D:\LC\DATA\H2L\YY-1-21\YY-1-21B 2013-01-07 10-23-09\023-0101.D\DA.M (ADH-
30-70-1ML-220NM.M)
Last changed    : 1/7/2013 4:27:55 PM by FX
                (modified after loading)
=====
```

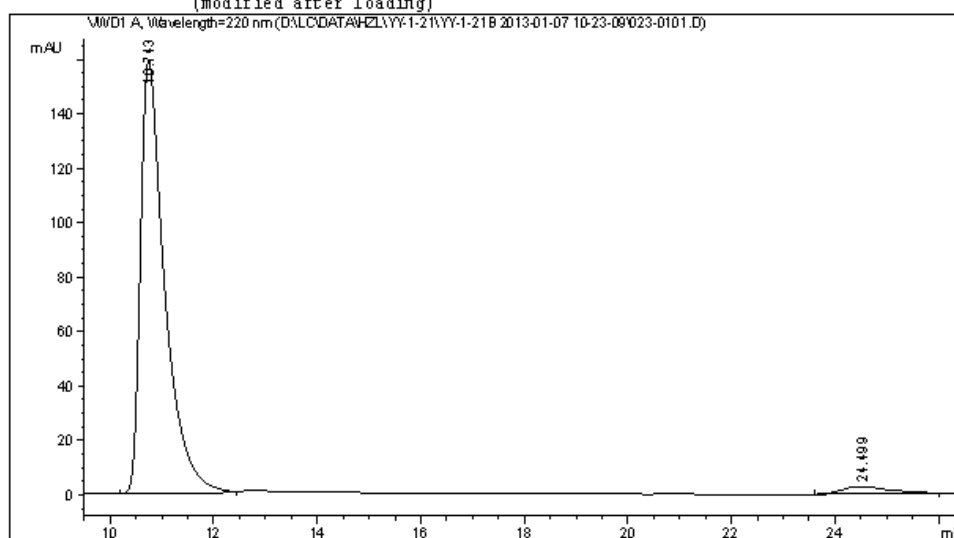

=====  
Area Percent Report  
=====

```
Sorted By      :      Signal
Multiplier     :      1.0000
Dilution       :      1.0000
Use Multiplier & Dilution Factor with ISTDs
```

Signal 1: VMD1 A, Wavelength=220 nm

| Peak # | RetTime [min] | Type | Width [min] | Area mAU   | Area %  | Height [mAU] |
|--------|---------------|------|-------------|------------|---------|--------------|
| 1      | 10.743        | BB   | 0.4759      | 5157.98340 | 96.7852 | 159.06123    |
| 2      | 24.499        | BB   | 0.7785      | 171.32874  | 3.2148  | 2.67758      |

Totals :                    5329.31213   161.73881

=====  
\*\*\* End of Report \*\*\*

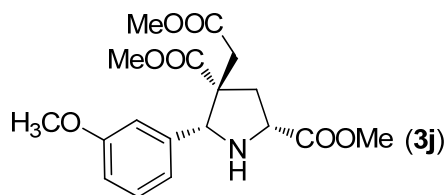

Data File D:\LC\DATA\H2L\YY-1-20\YY-1-20C-ODH 2013-01-07 15-06-16\024-0101.D  
 Sample Name: YY-1-20C

```

=====
Acq. Operator   : FX                               Seq. Line :    1
Acq. Instrument : Instrument 1                     Location  : Vial 24
Injection Date  : 1/7/2013 3:07:33 PM             Inj       :    1
                                                    Inj Volume: 5 µl
Acq. Method     : D:\LC\DATA\H2L\YY-1-20\YY-1-20C-ODH 2013-01-07 15-06-16\ODH-30-70-1ML-
                  220NM.M
Last changed    : 2/24/2012 7:20:25 PM by HH
Analysis Method : D:\LC\DATA\H2L\YY-1-20\YY-1-20C-ODH 2013-01-07 15-06-16\024-0101.D\DA.M (
                  ODH-30-70-1ML-220NM.M)
Last changed    : 1/7/2013 4:26:53 PM by FX
                  (modified after loading)
=====
  
```

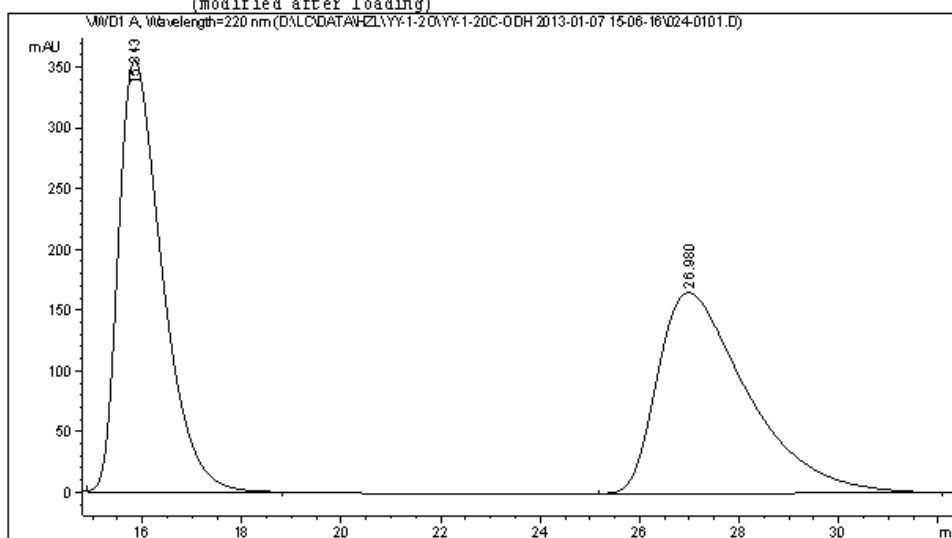

=====  
 Area Percent Report  
 =====

```

Sorted By      :      Signal
Multiplier     :      1.0000
Dilution       :      1.0000
Use Multiplier & Dilution Factor with ISTDs
  
```

Signal 1: WVD1 A, Wavelength=220 nm

| Peak #   | RetTime [min] | Type | Width [min] | Area mAU  | Area %    | Height [mAU] |
|----------|---------------|------|-------------|-----------|-----------|--------------|
| 1        | 15.843        | VB   | 0.9323      | 2.16656e4 | 51.0213   | 356.24222    |
| 2        | 26.980        | BB   | 1.8920      | 2.07983e4 | 48.9787   | 165.41560    |
| Totals : |               |      |             | 4.24639e4 | 521.65782 |              |



Data File D:\LC\DATA\H2L\YY-1-21\YY-1-21C-ODH 2013-01-07 15-51-21\025-0101.D  
Sample Name: YY-1-21C

```

=====
Acq. Operator   : FX                               Seq. Line :    1
Acq. Instrument : Instrument 1                       Location  : Vial 25
Injection Date  : 1/7/2013 3:52:47 PM              Inj       :    1
                                                    Inj Volume: 5 µl
Acq. Method     : D:\LC\DATA\H2L\YY-1-21\YY-1-21C-ODH 2013-01-07 15-51-21\ODH-30-70-1ML-
                  220NM.M
Last changed    : 2/24/2012 7:20:25 PM by HH
Analysis Method : D:\LC\DATA\H2L\YY-1-21\YY-1-21C-ODH 2013-01-07 15-51-21\025-0101.D\DA.M (
                  ODH-30-70-1ML-220NM.M)
Last changed    : 1/7/2013 4:30:55 PM by FX
                  (modified after loading)
=====

```

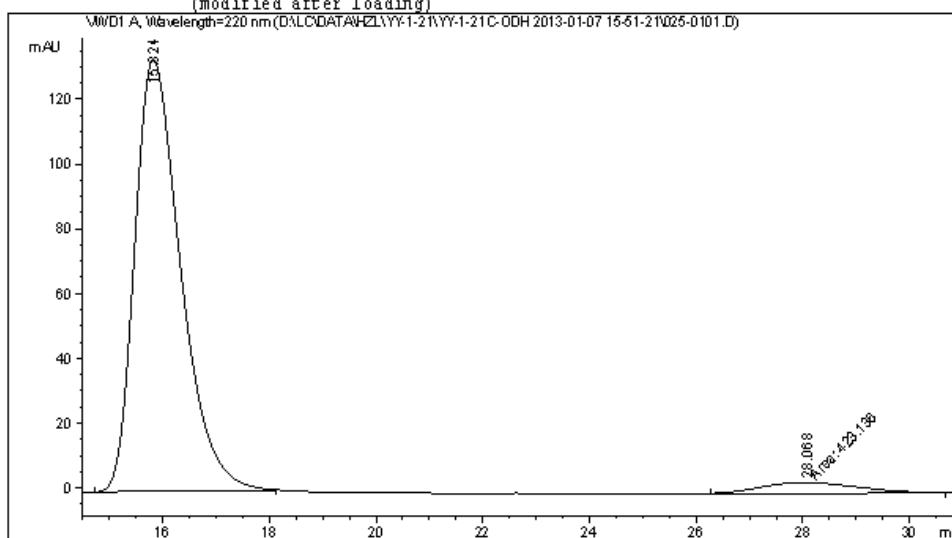

Area Percent Report

```

=====
Sorted By      :      Signal
Multiplier     :      1.0000
Dilution       :      1.0000
Use Multiplier & Dilution Factor with ISTDs
=====

```

Signal 1: WVD1 A, Wavelength=220 nm

| Peak # | RetTime [min] | Type | Width [min] | Area mAU *s | Height [mAU] | Area %  |
|--------|---------------|------|-------------|-------------|--------------|---------|
| 1      | 15.824        | BB   | 0.9138      | 7958.47607  | 133.24004    | 94.9516 |
| 2      | 28.068        | MM   | 2.1058      | 423.13553   | 3.34897      | 5.0484  |

Totals :                    8381.61160   136.58900

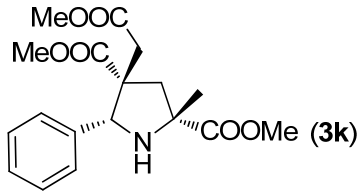

Data File D:\LC\DATA\H2L\H2L-9-64A-ADH\H2L-9-64A-ADH 2013-08-01 18-54-27\002-0101.D  
Sample Name: H2L-9-64A

```

=====
Acq. Operator   : TMC                      Seq. Line :    1
Acq. Instrument : Instrument 1              Location  : Vial 2
Injection Date  : 8/1/2013 6:55:43 PM      Inj       :    1
                                           Inj Volume: 5 µl
Acq. Method     : D:\LC\DATA\H2L\H2L-9-64A-ADH\H2L-9-64A-ADH 2013-08-01 18-54-27\ADH-20-80-
                    IML-220MM.M
Last changed    : 8/1/2013 7:07:44 PM by TMC
                    (modified after loading)
Analysis Method : D:\LC\DATA\H2L\H2L-9-64A-ADH\H2L-9-64A-ADH 2013-08-01 18-54-27\002-0101.D\
                    DA.M (ADH-20-80-IML-220MM.M)
Last changed    : 8/1/2013 8:24:30 PM by TMC
                    (modified after loading)
=====

```

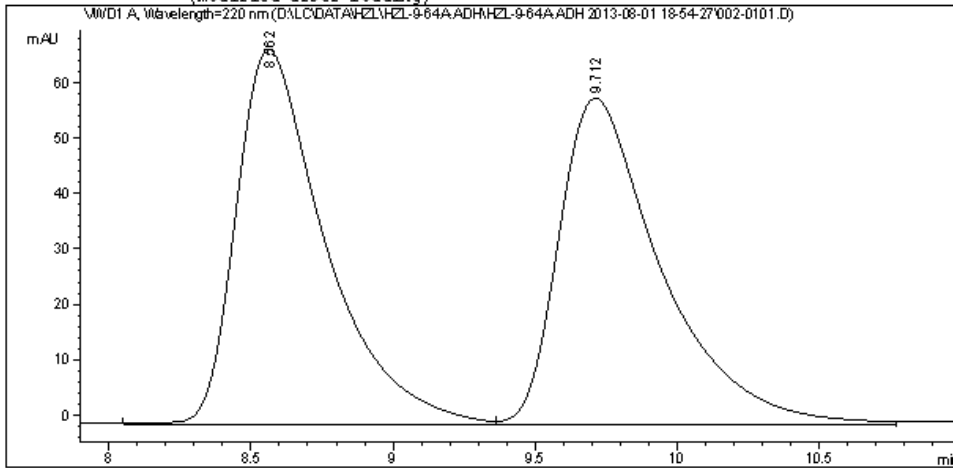

=====  
Area Percent Report  
=====

```

Sorted By      : Signal
Multiplier     : 1.0000
Dilution       : 1.0000
Use Multiplier & Dilution Factor with ISTDs

```

Signal 1: VWD1 A, Wavelength=220 nm

| Peak # | RetTime [min] | Type | Width [min] | Area mAU   | Area %  | Height [mAU] | Area %  |
|--------|---------------|------|-------------|------------|---------|--------------|---------|
| 1      | 8.562         | WV   | 0.3232      | 1480.70801 | 50.1724 | 67.80770     | 50.1724 |
| 2      | 9.712         | VB   | 0.3697      | 1470.53174 | 49.8276 | 58.93689     | 49.8276 |

Totals : 2951.23975 126.74459

=====  
\*\*\* End of Report \*\*\*





Data File D:\LC\DATA\HZL\HZL-9-64A-ADH\HZL-9-64A-ADH 2013-08-01 18-54-27\003-0201.D  
Sample Name: HZL-9-70A

```

=====
Acq. Operator   : TMC                      Seq. Line :    2
Acq. Instrument : Instrument 1              Location  : Vial 3
Injection Date  : 8/1/2013 7:10:19 PM      Inj       :    1
                                           Inj Volume: 5 µl
Acq. Method     : D:\LC\DATA\HZL\HZL-9-64A-ADH\HZL-9-64A-ADH 2013-08-01 18-54-27\ADH-20-80-
                    IML-220MM.M
Last changed    : 8/1/2013 7:08:32 PM by TMC
                    (modified after loading)
Analysis Method : D:\LC\DATA\HZL\HZL-9-64A-ADH\HZL-9-64A-ADH 2013-08-01 18-54-27\003-0201.D\
                    DA.M (ADH-20-80-IML-220MM.M)
Last changed    : 8/1/2013 8:23:28 PM by TMC
                    (modified after loading)
=====

```

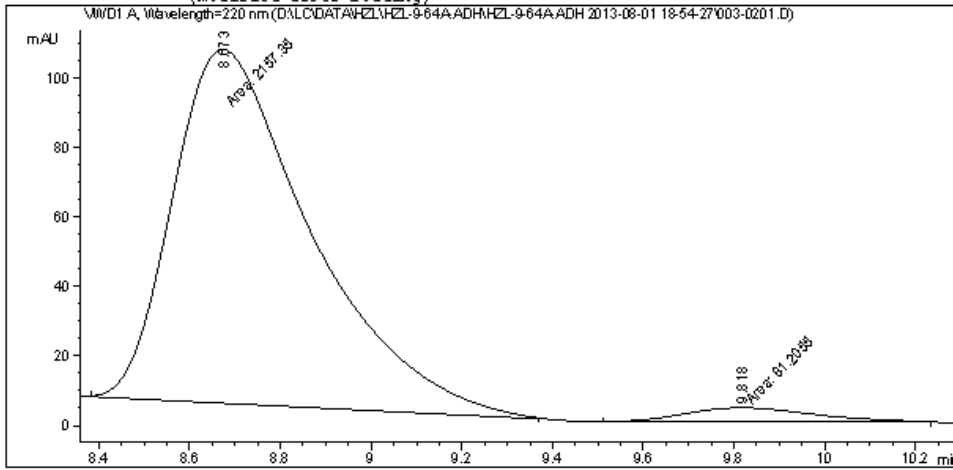

Area Percent Report

```

Sorted By      : Signal
Multiplier     : 1.0000
Dilution       : 1.0000
Use Multiplier & Dilution Factor with ISTDs

```

Signal 1: VWD1 A, Wavelength=220 nm

| Peak # | RetTime [min] | Type | Width [min] | Area mAU   | Area %  | Height [mAU] | Area %  |
|--------|---------------|------|-------------|------------|---------|--------------|---------|
| 1      | 8.673         | MM   | 0.3524      | 2157.34937 | 96.3724 | 102.03802    | 96.3724 |
| 2      | 9.818         | MM   | 0.3332      | 81.20545   | 3.6276  | 4.06176      | 3.6276  |

Totals : 2238.55482 106.09978

\*\*\* End of Report \*\*\*

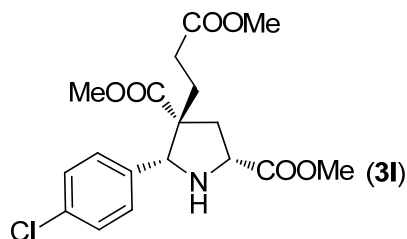

Data File D:\LC\DATA\THL\HH-2-14\HH-2-14 2011-12-01 16-55-34\031-0101.D  
 Sample Name: HH-2-14

```

=====
Acq. Operator   : THL                      Seq. Line :    1
Acq. Instrument : Instrument 1              Location  : Vial 31
Injection Date  : 12/1/2011 4:57:40 PM    Inj       :    1
                                           Inj Volume: 5 µl

Acq. Method     : D:\LC\201111\thl\HH-2-14\HH-2-14 2011-12-01 16-55-34\ASH-60-40-1ML-210NM.M
Last changed    : 12/1/2011 4:54:56 PM by THL
Analysis Method : D:\LC\DATA\THL\HH-2-14\HH-2-14 2011-12-01 16-55-34\031-0101.D\DA.M (ASH-
60-40-1ML-210NM.M)
Last changed    : 5/7/2013 8:55:04 PM by TL
                 (modified after loading)
Method Info     : ASH-50-50-1ML-254NM-50MIN
  
```

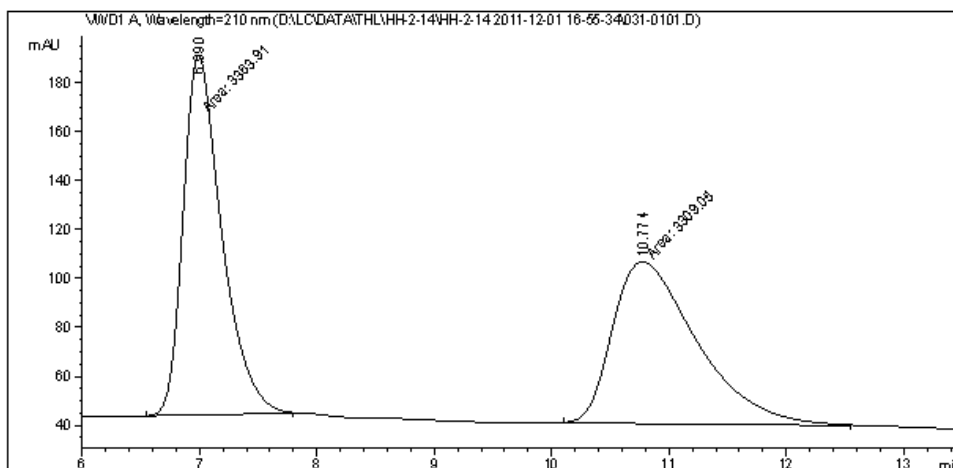

Area Percent Report

```

Sorted By      : Signal
Multiplier     : 1.0000
Dilution       : 1.0000
Use Multiplier & Dilution Factor with ISTDs
  
```

Signal 1: VMD1 A, Wavelength=210 nm

| Peak # | RetTime [min] | Type | Width [min] | Area mAU   | Area *s   | Height [mAU] | Area % |
|--------|---------------|------|-------------|------------|-----------|--------------|--------|
| 1      | 6.990         | MM   | 0.3811      | 3363.91431 | 147.11465 | 50.4111      |        |
| 2      | 10.774        | MM   | 0.8328      | 3309.04517 | 66.21954  | 49.5889      |        |

Totals : 6672.95947 213.33419

\*\*\* End of Report \*\*\*



Data File D:\LC\DATA\THL\YL-1-27\YL-1-27 2011-12-08 17-15-33\010-0101.D  
 Sample Name: YL-1-27

```

=====
Acq. Operator   : YL                      Seq. Line :    1
Acq. Instrument : Instrument 1             Location  : Vial 10
Injection Date  : 12/8/2011 5:17:25 PM    Inj       :    1
                                           Inj Volume: 5 µl

Acq. Method     : D:\LC\201112\YL\YL-1-27\YL-1-27 2011-12-08 17-15-33\ASH-60-40-1ML-210NM-
                  20MIN.M
Last changed    : 12/8/2011 5:14:13 PM by THL
Analysis Method : D:\LC\DATA\THL\YL-1-27\YL-1-27 2011-12-08 17-15-33\010-0101.D\DA.M (ASH-
                  60-40-1ML-210NM-20MIN.M)
Last changed    : 5/7/2013 8:56:42 PM by TL
                  (modified after loading)
=====
  
```

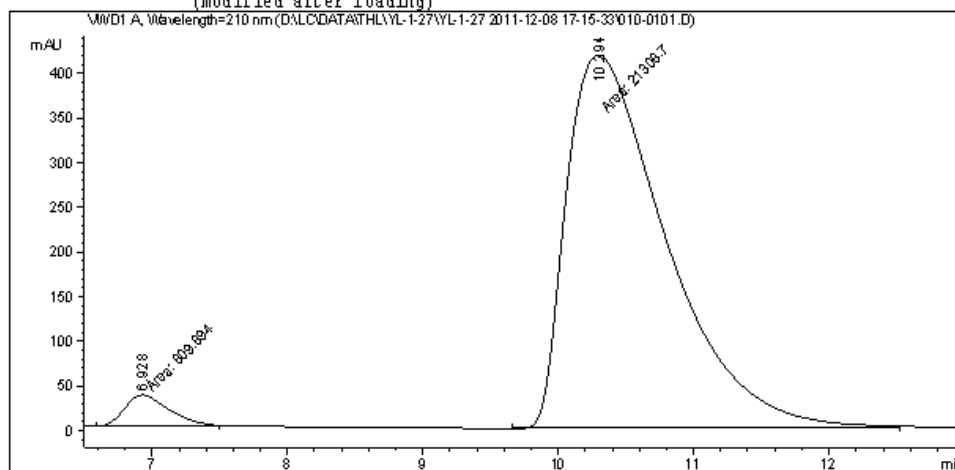

=====  
 Area Percent Report  
 =====

```

Sorted By       : Signal
Multiplier      : 1.0000
Dilution        : 1.0000
Use Multiplier & Dilution Factor with ISTDs
  
```

Signal 1: VMD1 A, Wavelength=210 nm

| Peak # | RetTime [min] | Type | Width [min] | Area mAU  | Height [mAU] | Area %  |
|--------|---------------|------|-------------|-----------|--------------|---------|
| 1      | 6.928         | MM   | 0.3836      | 809.89410 | 35.18781     | 3.6616  |
| 2      | 10.294        | MM   | 0.8495      | 2.13087e4 | 418.05701    | 96.3384 |

Totals : 2.21186e4 453.24481

=====  
 \*\*\* End of Report \*\*\*

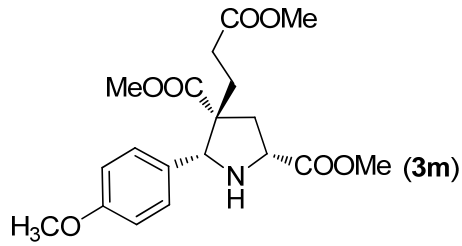

Data File D:\LC\DATA\H2L\YY-1-60\YY-1-60B 2013-05-11 15-48-22\081-0101.D  
 Sample Name: YY-1-60B

```

=====
Acq. Operator   : TL                      Seq. Line :    1
Acq. Instrument : Instrument 1             Location  : Vial 81
Injection Date  : 5/11/2013 3:49:46 PM    Inj       :    1
                                           Inj Volume: 5 µl

Acq. Method    : D:\LC\DATA\H2L\YY-1-60\YY-1-60B 2013-05-11 15-48-22\ASH-40-60-10ML-220NM.M
Last changed   : 3/29/2012 7:36:14 PM by HZL
Analysis Method : D:\LC\DATA\H2L\YY-1-60\YY-1-60B 2013-05-11 15-48-22\081-0101.D\DA.M (ASH-
40-60-10ML-220NM.M)
Last changed   : 5/20/2013 10:09:41 AM by CX
                (modified after loading)
  
```

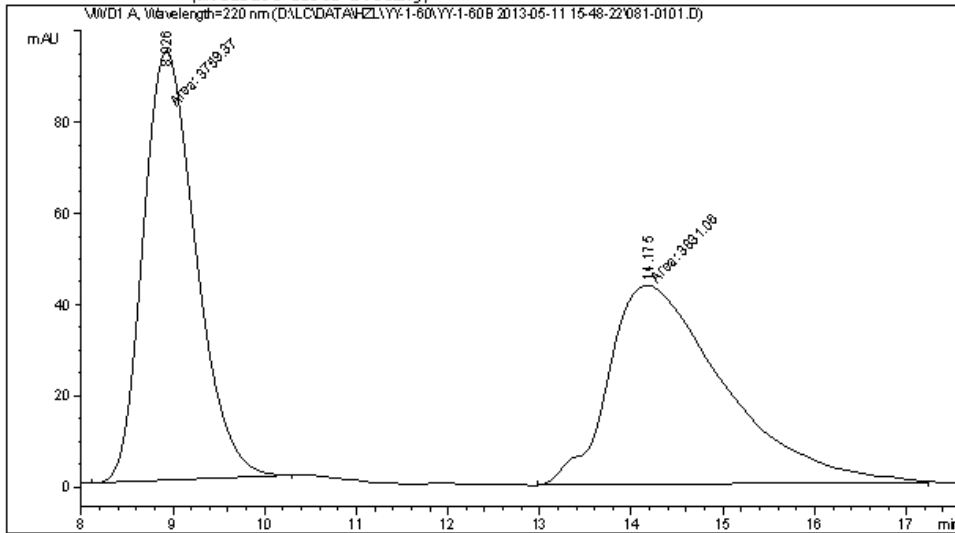

Area Percent Report

```

Sorted By      : Signal
Multiplier     : 1.0000
Dilution       : 1.0000
Use Multiplier & Dilution Factor with ISTDs
  
```

Signal 1: VMD1 A, Wavelength=220 nm

| Peak # | RetTime [min] | Type | Width [min] | Area mAU   | Height [mAU] | Area %  |
|--------|---------------|------|-------------|------------|--------------|---------|
| 1      | 8.926         | MM   | 0.6654      | 3759.36841 | 94.16240     | 49.5278 |
| 2      | 14.175        | MM   | 1.4615      | 3831.05737 | 43.68966     | 50.4722 |

Totals : 7590.42578 137.85206

\*\*\* End of Report \*\*\*



Data File D:\LC\DATA\HZL\YY-1-61\YY-1-61B 2013-05-11 16-33-22\082-0101.D  
 Sample Name: YY-1-61B

```

=====
Acq. Operator   : TL                               Seq. Line :    1
Acq. Instrument : Instrument 1                       Location  : Vial 82
Injection Date  : 5/11/2013 4:34:47 PM             Inj       :    1
                                                    Inj Volume: 5 µl

Acq. Method     : D:\LC\DATA\HZL\YY-1-61\YY-1-61B 2013-05-11 16-33-22\ASH-40-60-10ML-220NM-
30MIN.M
Last changed    : 12/28/2012 10:12:11 PM by FX
Analysis Method : D:\LC\DATA\HZL\YY-1-61\YY-1-61B 2013-05-11 16-33-22\082-0101.D\DA.M (ASH-
40-60-10ML-220NM-30MIN.M)
Last changed    : 5/20/2013 9:52:50 AM by CX
(modified after loading)
  
```

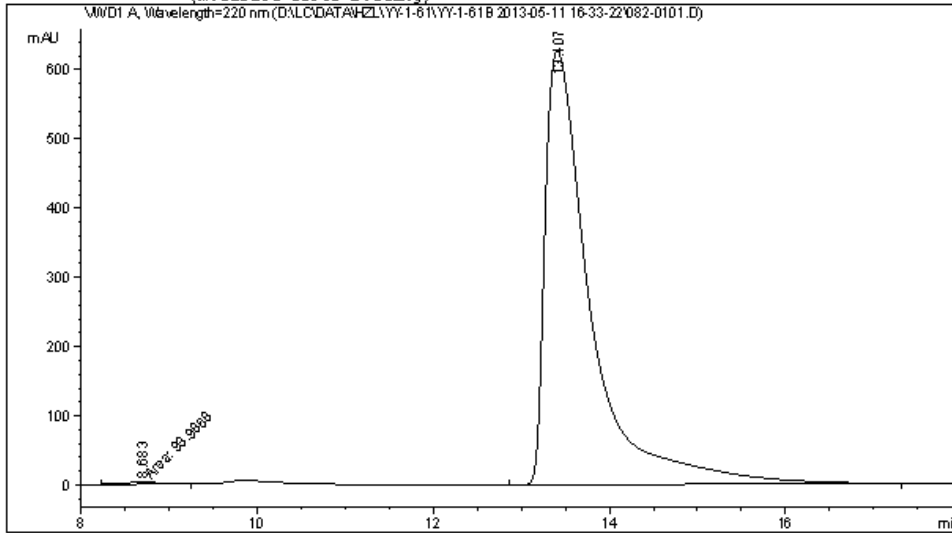

=====  
 Area Percent Report  
 =====

```

Sorted By       :      Signal
Multiplier      :      1.0000
Dilution        :      1.0000
Use Multiplier & Dilution Factor with ISTDs
  
```

Signal 1: VMD1 A, Wavelength=220 nm

| Peak # | RetTime [min] | Type | Width [min] | Area mAU  | Area %  | Height [mAU] | Area %  |
|--------|---------------|------|-------------|-----------|---------|--------------|---------|
| 1      | 8.683         | MM   | 0.4266      | 93.98680  | 0.4158  | 2.63090      | 0.4158  |
| 2      | 13.407        | VB   | 0.5324      | 2.25125e4 | 99.5842 | 627.02307    | 99.5842 |

Totals :                    2.26065e4   629.65398
